# Supplementary material for: Organic binary charge-transfer compounds of 2,2′ : 6′,2′′ : 6′′,6-trioxotriphenylamine and a pyrene-annulated azaacene as donors
Source: Royal Society of Chemistry journal article supplement (doi:10.1039/d2ra07322f), 2023-01-01
Supplement: d2ra07322f1.pdf [file d2ra07322f1.pdf]

## **Organic binary charge-transfer compounds of 2,2':6',2'':6'',6-trioxotriphenylamine and a pyrene-annulated azaacene as donors**

Rajorshi Das,<sup>a</sup> Michael Linseis,<sup>a</sup> Stefan M. Schupp,<sup>b</sup> Franciska S. Gogesch,<sup>a</sup> Lukas Schmidt-Mende,<sup>b</sup> and Rainer F. Winter <sup>\*a</sup>

<sup>a</sup>*Fachbereich Chemie, Universität Konstanz, Universitätsstrasse 10, 78457 Konstanz (Germany)*

<sup>b</sup>*S. M. Schupp, Prof. Dr. L. Schmidt-Mende, Fachbereich Physik, Universität Konstanz, Universitätsstrasse 10, 78457 Konstanz (Germany)*

To whom correspondence should be addressed: E-mail: [rainer.winter@uni-konstanz.de](mailto:rainer.winter@uni-konstanz.de).

## Materials and methods

**General Methods.** All manipulations were performed under an atmosphere of purified nitrogen with dry, distilled, and nitrogen-saturated solvents. Donors 2,2':6',2'':6'',6-trioxotriphenylamine (TOTA)<sup>1</sup> and pyrene-annulated azaacene (PAA)<sup>2</sup> were synthesized according to the previously reported procedures. All acceptors F<sub>4</sub>TCNQ, TCNQ, F<sub>4</sub>BQ, Cl<sub>4</sub>BQ and Br<sub>4</sub>BQ were purchased from commercial sources and were further purified via sublimation before use.

**IR-, UV-vis-NIR and EPR Spectra Measurements.** FT-IR spectra were recorded on a Bruker TensorIII instrument. UV-vis-NIR spectra on solid samples were obtained on a Cary 5000 UV-Vis-NIR spectrometer. The powderous sample was pressed between two glass slides, put into a sample holder and inserted into the centre position of an integrating sphere, which diminishes scattering and reflection losses. Electron paramagnetic resonance (EPR) studies were performed on a table-top X-band spectrometer MiniScope MS 400 from magnetec. Simulation of the experimental EPR spectra was performed with the MATLAB EasySpin program.

**X-Ray Crystallography.** X-Ray diffraction analysis was performed on a STOE IPDS-II diffractometer (STOE & CIE GmbH, Darmstadt, Germany) equipped with a graphite-monochromated MoK<sub>α</sub> radiation source ( $\lambda = 0.71073 \text{ \AA}$ ) or, in the case of (PAA)<sub>4</sub>·F<sub>4</sub>TCNQ, a CuK<sub>α</sub> radiation source ( $\lambda = 1.54186 \text{ \AA}$ ) and an image plate detection system at  $T = 100.15 \text{ K}$ . Using *Olex2*,<sup>3</sup> the structures were solved with the *ShelXT*<sup>4</sup> structure solution program using Intrinsic Phasing and refined with the *ShelXL*<sup>4</sup> refinement package using Least Squares minimization. Hydrogen atoms were introduced at their calculated positions. Structure plots were generated with the Mercury program.<sup>5</sup> Crystallographic data were deposited at the Cambridge Crystallographic Data Centre and can be retrieved with their CCDC reference numbers 2220394 ((PAA)<sub>4</sub>·F<sub>4</sub>TCNQ), 2220397 ((TOTA)<sub>2</sub>·F<sub>4</sub>BQ) and 2220398 ((TOTA)<sub>2</sub>·(F<sub>4</sub>TCNQ)<sub>2</sub>·CH<sub>2</sub>Cl<sub>2</sub>).

**Conductivity Measurements.** Conductivity measurements were performed with single crystals of charge-transfer compounds. Crystals were placed on a gold plate or a conductive Cu-tape, which was kept on a scanning electron microscope (SEM) stamp. Micrometer-sized tungsten probe tips were used as electrodes. During measurements, the applied voltage was varied from -20 to 20 V.

## Experimental procedures

**(TOTA)<sub>2</sub>·(F<sub>4</sub>TCNQ)<sub>2</sub>·CH<sub>2</sub>Cl<sub>2</sub>.** 2,2':6',2'':6'',6-Trioxotriphenylamine (TOTA, 1.4 mg, 0.005 mmol) and 2,3,5,6-tetrafluoro-7,7,8,8-tetracyanoquinodimethane (F<sub>4</sub>TCNQ, 1.4 mg, 0.005 mmol) were dissolved in dichloromethane (4 mL) via sonication. The solvent was allowed to slowly evaporate. After 3 days, dark purple crystals of (TOTA)<sub>2</sub>·(F<sub>4</sub>TCNQ)<sub>2</sub>·CH<sub>2</sub>Cl<sub>2</sub> were obtained.

**Yield:** Quantitative.

**IR** (KBr, cm<sup>-1</sup>): 2196 (s), 2176 (s), 1641 (m), 1631 (s), 1613 (s), 1590 (s), 1502 (s), 1482 (m), 1385 (s), 1277 (m), 1200 (w), 1142 (w), 1075 (m), 1030 (m).

**EPR:**  $g_{\text{iso}}$ -value = 1.9990

**Elemental (CHN) Analysis:** C: 60.80, H: 2.04, N: 11.50 (Calcd. C: 60.46, H: 1.66, N: 11.56 for (TOTA)<sub>2</sub>·(F<sub>4</sub>TCNQ)<sub>2</sub>·CH<sub>2</sub>Cl<sub>2</sub> (C<sub>61</sub>H<sub>20</sub>N<sub>10</sub>O<sub>6</sub>F<sub>8</sub>Cl<sub>2</sub>).

**(TOTA)<sub>2</sub>·F<sub>4</sub>BQ.** 2,2':6',2'':6'',6-Trioxotriphenylamine (TOTA, 1.4 mg, 0.005 mmol) and tetrafluoro-1,4-benzoquinone (F<sub>4</sub>BQ, 0.9 mg, 0.005 mmol) were dissolved in dichloromethane (6 mL) via sonication. The solution was allowed to slowly evaporate. After 4 days, dark orange crystals of (TOTA)<sub>2</sub>·F<sub>4</sub>BQ were obtained, which were manually separated for further studies.

**IR** (KBr, cm<sup>-1</sup>): 1664 (m), 1641 (m), 1620 (s), 1599 (m), 1526 (m), 1502 (m), 1482 (vs), 1402 (w), 1384 (w), 1357 (w), 1338 (s), 1318 (m), 1266 (s), 1157 (w), 1069 (s), 1017 (s).

**EPR:**  $g_{\text{iso}}$ -value = 1.9880

**Elemental (CHN) Analysis:** C: 67.04, H: 2.16, N: 3.75 (Calcd. C: 66.85, H: 2.40, N: 3.71 for (TOTA)<sub>2</sub>·(F<sub>4</sub>BQ), C<sub>42</sub>H<sub>18</sub>F<sub>4</sub>N<sub>2</sub>O<sub>4</sub>).

**Synthesis of (PAA)<sub>4</sub>·F<sub>4</sub>TCNQ:** Pyrene-annulated azaacene (PAA, 4.9 mg, 0.01 mmol) and 2,3,5,6-tetrafluoro-7,7,8,8-tetracyanoquinodimethane (F<sub>4</sub>TCNQ, 2.8 mg, 0.01 mmol) were dissolved in dichloromethane (4 mL) via sonication. The solvent was allowed to slowly evaporate. After 3 days, dark red crystals of the title compound were obtained and collected.

**IR** (KBr, cm<sup>-1</sup>): 2225 (s), 2212 (m), 1622 (m), 1607 (m), 1587 (s), 1565 (m), 1482 (s), 1459 (s), 1423 (w), 1402 (m), 1383 (s), 1352 (s), 1334 (s), 1308 (s), 1248 (vs), 1150 (s), 1112 (s), 1086 (m), 1042 (m).

**EPR:**  $g_{\text{iso}}$ -value = 1.9898.

**Elemental (CHN) Analysis:** C: 73.87, H: 4.81, N: 7.59 (Calcd. C: 74.30, H: 4.99, N: 7.43 for (PAA)<sub>4</sub>·(F<sub>4</sub>TCNQ), C<sub>70</sub>H<sub>56</sub>F<sub>2</sub>N<sub>6</sub>Si<sub>4</sub>).

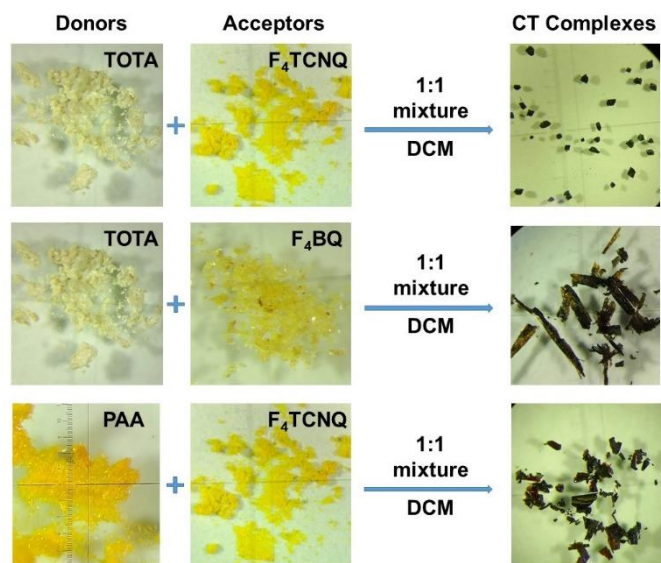

**Figure S1.** Photographs of the crystalline CT compounds of this study and their precursors.

### Cyclic Voltammetry

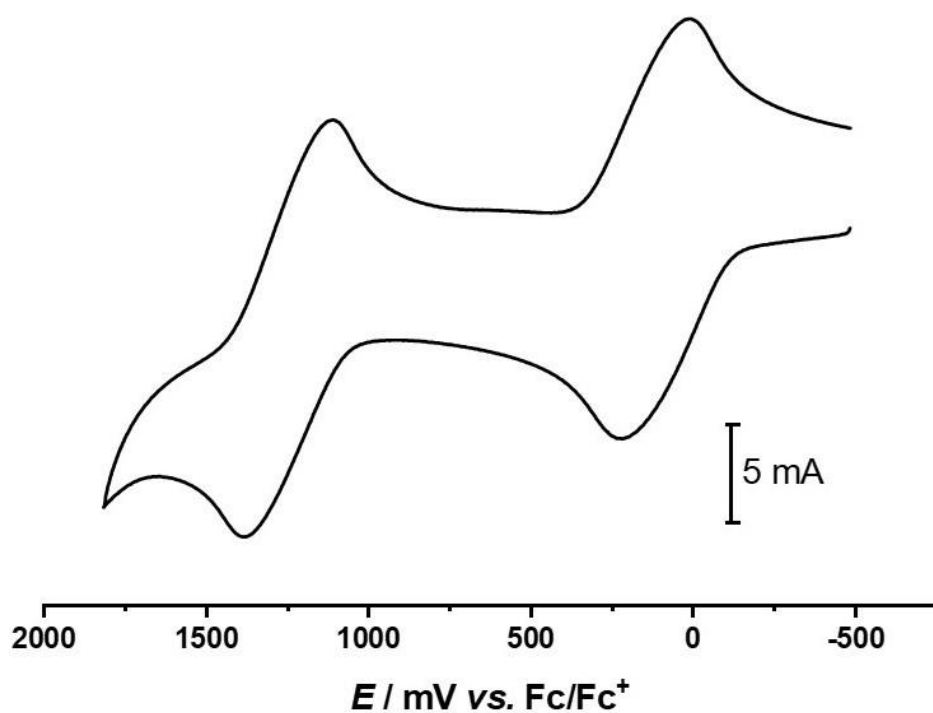

**Figure S2.** Cyclic voltammogram of **TOTA** at  $\nu = 100$  mV/s with 0.1 M TBAPF<sub>6</sub> as the supporting electrolyte in dichloromethane at 295( $\pm$ 3) K.



## X-ray Diffraction Analysis

**Table S1.** Crystal data and structure refinement for (TOTA)<sub>2</sub>·(F<sub>4</sub>TCNQ)<sub>2</sub>·CH<sub>2</sub>Cl<sub>2</sub>.

|                                                              |                                                                                               |
|--------------------------------------------------------------|-----------------------------------------------------------------------------------------------|
| Empirical formula                                            | C <sub>61</sub> H <sub>20</sub> Cl <sub>2</sub> F <sub>8</sub> N <sub>10</sub> O <sub>6</sub> |
| Formula weight                                               | 1211.77                                                                                       |
| Temperature/K                                                | 100                                                                                           |
| Crystal system                                               | monoclinic                                                                                    |
| Space group                                                  | <i>P</i> 2 <sub>1</sub> / <i>c</i>                                                            |
| <i>a</i> /Å                                                  | 17.1173(6)                                                                                    |
| <i>b</i> /Å                                                  | 19.0311(5)                                                                                    |
| <i>c</i> /Å                                                  | 16.1480(6)                                                                                    |
| $\alpha$ /°                                                  | 90                                                                                            |
| $\beta$ /°                                                   | 109.490(3)                                                                                    |
| $\gamma$ /°                                                  | 90                                                                                            |
| Volume/Å <sup>3</sup>                                        | 4959.0(3)                                                                                     |
| <i>Z</i>                                                     | 4                                                                                             |
| $\rho_{\text{calc}}$ g/cm <sup>3</sup>                       | 1.623                                                                                         |
| $\mu$ /mm <sup>-1</sup>                                      | 0.232                                                                                         |
| <i>F</i> (000)                                               | 2440.0                                                                                        |
| Crystal size/mm <sup>3</sup>                                 | 0.5 × 0.3 × 0.2                                                                               |
| Radiation                                                    | Mo K $\alpha$ ( $\lambda$ = 0.71073)                                                          |
| 2 $\theta$ range for data collection/°                       | 3.688 to 55.38°                                                                               |
| Index ranges                                                 | -22 ≤ <i>h</i> ≤ 22, -24 ≤ <i>k</i> ≤ 24, -20 ≤ <i>l</i> ≤ 18                                 |
| Reflections collected                                        | 29782                                                                                         |
| Independent reflections                                      | 11385 [ <i>R</i> <sub>int</sub> = 0.0283, <i>R</i> <sub>sigma</sub> = 0.0279]                 |
| Data/restraints/parameters                                   | 11385/0/785                                                                                   |
| Goodness-of-fit on <i>F</i> <sup>2</sup>                     | 1.050                                                                                         |
| Final <i>R</i> indexes [ <i>I</i> ≥ 2 $\sigma$ ( <i>I</i> )] | <i>R</i> <sub>1</sub> = 0.0488, <i>wR</i> <sub>2</sub> = 0.1047                               |
| Final <i>R</i> indexes [all data]                            | <i>R</i> <sub>1</sub> = 0.0804, <i>wR</i> <sub>2</sub> = 0.1292                               |
| Largest diff. peak/hole / e Å <sup>-3</sup>                  | 0.31/-0.45                                                                                    |

**Table S2.** Fractional Atomic Coordinates ( $\times 10^4$ ) and Equivalent Isotropic Displacement Parameters ( $\text{\AA}^2 \times 10^3$ ) for  $(\text{TOTA})_2 \cdot (\text{F}_4\text{TCNQ})_2 \cdot \text{CH}_2\text{Cl}_2$ .  $U_{\text{eq}}$  is defined as 1/3 of the trace of the orthogonalised  $U_{ij}$  tensor.

| Atom | x          | y           | z          | U(eq)   |
|------|------------|-------------|------------|---------|
| C12  | 4951.4(5)  | 732.7(6)    | 9046.4(5)  | 62.6(2) |
| C11  | 4717.1(5)  | -735.3(6)   | 8476.1(6)  | 64.1(2) |
| F3   | 2669.8(8)  | 5284.8(7)   | 3709.5(8)  | 27.9(3) |
| F8   | 841.3(8)   | 6423.5(7)   | 4100.9(8)  | 28.4(3) |
| F2   | 3188.2(9)  | 3523.8(7)   | 5903.6(8)  | 30.0(3) |
| F6   | 1164.7(9)  | 3695.8(7)   | 5099.5(8)  | 29.8(3) |
| F4   | 2770.0(8)  | 6246.1(7)   | 4890.1(8)  | 28.3(3) |
| F1   | 3290.6(9)  | 4490.0(7)   | 7089.8(8)  | 29.8(3) |
| F7   | 734.9(8)   | 5463.2(7)   | 2920.7(8)  | 28.3(3) |
| F5   | 1253.5(9)  | 4656.6(7)   | 6280.6(8)  | 29.0(3) |
| O5   | 639.2(9)   | 1739.9(8)   | 5081.2(10) | 23.8(3) |
| O6   | 3220.8(9)  | 2510.3(9)   | 7192.6(10) | 26.7(3) |
| O4   | 3225.1(9)  | 804.0(8)    | 4984.9(10) | 27.6(3) |
| O2   | 1226.9(9)  | -1809.0(8)  | 3920.5(10) | 26.5(3) |
| O3   | 3659.0(10) | -897.1(10)  | 6145.3(11) | 36.2(4) |
| O1   | 3932.9(11) | -2683.2(10) | 4143.8(12) | 37.1(4) |
| N2   | 2361.3(11) | 1687.8(10)  | 5747.0(11) | 22.4(4) |
| N3   | 2826.5(12) | 2487.9(10)  | 4350.2(12) | 28.0(4) |
| N1   | 2936.3(11) | -1795.7(10) | 4734.9(12) | 25.9(4) |
| N4   | 2820.8(12) | 4099.9(11)  | 2522.4(12) | 28.9(4) |
| N10  | 1179.5(13) | 5866.9(11)  | 7483.7(13) | 31.1(4) |
| N8   | 813.8(13)  | 4236.2(11)  | 1715.6(13) | 31.1(4) |
| N6   | 3237.4(13) | 5772.3(11)  | 8310.9(13) | 31.7(4) |
| N7   | 708.5(13)  | 2676.5(11)  | 3549.0(13) | 32.6(5) |
| N5   | 3285.2(13) | 7276.1(11)  | 6437.7(13) | 32.1(4) |
| N9   | 1213.0(14) | 7451.8(11)  | 5635.6(13) | 36.0(5) |
| C37  | 3028.7(12) | 5426.1(11)  | 6057.8(13) | 21.1(4) |
| C26  | 2366.2(13) | 2536.6(12)  | 6851.0(14) | 23.2(4) |
| C19  | 1938.3(13) | 1284.6(11)  | 5034.9(14) | 22.5(4) |
| C43  | 2826.1(13) | 3821.6(11)  | 4085.0(14) | 22.7(4) |
| C20  | 2370.8(13) | 848.6(12)   | 4642.4(14) | 24.1(4) |
| C25  | 1934.7(13) | 2124.5(12)  | 6125.8(14) | 22.7(4) |
| C38  | 2885.5(13) | 5572.1(11)  | 5159.7(14) | 22.2(4) |
| C51  | 868.0(13)  | 5249.3(12)  | 3750.8(13) | 23.0(4) |
| C56  | 844.5(13)  | 4148.6(12)  | 2430.5(14) | 24.6(5) |
| C39  | 2833.8(13) | 5070.7(12)  | 4544.7(13) | 21.7(4) |
| C44  | 2819.9(13) | 3989.4(11)  | 3222.8(14) | 23.3(4) |
| C40  | 2907.7(12) | 4346.3(11)  | 4732.9(13) | 21.1(4) |
| C55  | 902.4(13)  | 3994.3(11)  | 3313.8(14) | 22.6(4) |
| C49  | 1058.9(12) | 5600.9(11)  | 5266.0(13) | 21.0(4) |
| C46  | 3079.1(13) | 5958.0(12)  | 6685.1(14) | 23.3(4) |
| C58  | 1141.1(13) | 6123.0(11)  | 5906.2(14) | 22.4(4) |
| C32  | 3639.2(14) | 1208.6(12)  | 5700.4(14) | 25.5(5) |
| C24  | 1071.8(13) | 1317.8(11)  | 4700.8(14) | 23.3(4) |
| C30  | 1070.9(13) | 2142.9(11)  | 5794.3(13) | 22.3(4) |

**Table S2.** Fractional Atomic Coordinates ( $\times 10^4$ ) and Equivalent Isotropic Displacement Parameters ( $\text{\AA}^2 \times 10^3$ ) for  $(\text{TOTA})_2 \cdot (\text{F}_4\text{TCNQ})_2 \cdot \text{CH}_2\text{Cl}_2$ .  $U_{\text{eq}}$  is defined as 1/3 of the trace of the orthogonalised  $U_{ij}$  tensor.

| Atom | x          | y           | z          | U(eq)   |
|------|------------|-------------|------------|---------|
| C54  | 1111.3(13) | 4869.9(12)  | 5448.4(13) | 22.0(4) |
| C45  | 2832.2(13) | 3089.1(12)  | 4256.5(14) | 22.9(4) |
| C59  | 1169.6(13) | 5965.6(11)  | 6776.4(14) | 23.8(4) |
| C29  | 637.0(14)  | 2561.8(12)  | 6180.1(14) | 24.6(5) |
| C41  | 3064.7(13) | 4196.5(11)  | 5635.1(14) | 22.4(4) |
| C50  | 921.7(13)  | 5749.0(11)  | 4366.0(14) | 21.6(4) |
| C31  | 3213.2(13) | 1663.9(12)  | 6084.2(14) | 24.1(4) |
| C52  | 939.3(12)  | 4518.6(11)  | 3939.1(13) | 21.1(4) |
| C7   | 2445.4(14) | -1351.8(12) | 5020.1(14) | 24.7(5) |
| C23  | 645.5(14)  | 924.8(12)   | 3973.3(15) | 26.2(5) |
| C36  | 3637.3(14) | 2080.3(12)  | 6801.1(14) | 26.1(5) |
| C8   | 1587.5(14) | -1359.6(12) | 4605.9(14) | 24.3(4) |
| C2   | 1729.0(14) | -2223.0(12) | 3612.3(14) | 25.9(5) |
| C47  | 3161.3(13) | 5825.6(12)  | 7578.9(14) | 25.1(5) |
| C42  | 3118.5(13) | 4698.1(12)  | 6251.4(13) | 21.8(4) |
| C60  | 1170.1(14) | 6854.9(12)  | 5733.8(14) | 25.4(5) |
| C48  | 3179.4(13) | 6685.5(13)  | 6517.7(14) | 25.3(5) |
| C53  | 1062.6(13) | 4371.6(11)  | 4833.6(14) | 22.1(4) |
| C1   | 2584.4(14) | -2227.1(12) | 4025.1(14) | 26.2(5) |
| C27  | 1940.1(14) | 2963.7(12)  | 7235.7(14) | 26.7(5) |
| C57  | 809.3(14)  | 3267.1(12)  | 3469.3(14) | 25.2(5) |
| C21  | 1953.0(15) | 455.0(12)   | 3920.8(15) | 28.3(5) |
| C13  | 3785.4(14) | -1792.8(13) | 5141.8(15) | 30.2(5) |
| C3   | 1376.9(16) | -2634.9(12) | 2883.4(15) | 30.1(5) |
| C12  | 2806.2(14) | -906.6(13)  | 5735.0(15) | 29.1(5) |
| C33  | 4491.2(14) | 1172.0(14)  | 6043.1(15) | 30.8(5) |
| C35  | 4492.6(14) | 2058.2(14)  | 7134.2(16) | 31.3(5) |
| C14  | 4273.9(15) | -2251.4(14) | 4849.4(17) | 34.3(6) |
| C6   | 3086.7(15) | -2662.1(13) | 3719.5(16) | 30.0(5) |
| C9   | 1093.4(15) | -918.3(12)  | 4888.8(15) | 28.1(5) |
| C18  | 4136.3(15) | -1343.3(14) | 5849.4(16) | 33.3(5) |
| C28  | 1077.4(15) | 2971.8(12)  | 6896.7(15) | 27.1(5) |
| C10  | 1464.5(16) | -483.7(13)  | 5600.9(16) | 31.4(5) |
| C22  | 1090.2(15) | 499.2(12)   | 3599.2(15) | 28.9(5) |
| C11  | 2319.7(16) | -469.7(13)  | 6032.6(16) | 32.9(5) |
| C4   | 1887.4(17) | -3059.2(13) | 2582.2(16) | 35.2(6) |
| C34  | 4900.9(15) | 1603.4(14)  | 6748.8(16) | 34.0(6) |
| C5   | 2742.1(17) | -3078.1(13) | 2997.6(16) | 35.2(6) |
| C17  | 4987.5(16) | -1344.5(17) | 6263.8(17) | 43.5(7) |
| C15  | 5120.2(16) | -2264.5(17) | 5272.8(18) | 41.7(7) |
| C16  | 5462.3(16) | -1810.9(18) | 5963.0(19) | 46.8(7) |
| C61  | 4707.2(18) | 149.0(19)   | 8147.0(19) | 53.0(8) |



**Table S3.** Anisotropic Displacement Parameters ( $\text{\AA}^2 \times 10^3$ ) for  $(\text{TOTA})_2 \cdot (\text{F}_4\text{TCNQ})_2 \cdot \text{CH}_2\text{Cl}_2$ . The Anisotropic displacement factor exponent takes the form:  $-2\pi^2[h^2a^*2U_{11}+2hka^*b^*U_{12}+\dots]$ .

| Atom | $U_{11}$ | $U_{22}$ | $U_{33}$ | $U_{23}$ | $U_{13}$ | $U_{12}$ |
|------|----------|----------|----------|----------|----------|----------|
| Cl2  | 34.4(4)  | 102.1(7) | 47.5(4)  | -6.3(4)  | 8.5(3)   | 10.6(4)  |
| Cl1  | 47.1(4)  | 88.9(7)  | 50.3(5)  | 11.6(4)  | 8.2(3)   | -11.7(4) |
| F3   | 40.0(7)  | 26.0(7)  | 17.6(6)  | 2.5(5)   | 9.6(5)   | 2.2(6)   |
| F8   | 39.1(7)  | 21.1(6)  | 23.8(6)  | 4.4(5)   | 8.9(6)   | 5.6(6)   |
| F2   | 41.3(8)  | 22.1(7)  | 24.3(7)  | 5.0(5)   | 7.7(6)   | 4.2(6)   |
| F6   | 45.3(8)  | 19.2(6)  | 24.5(7)  | 2.8(5)   | 11.3(6)  | -0.9(6)  |
| F4   | 41.4(8)  | 20.3(6)  | 22.8(6)  | 2.2(5)   | 10.2(6)  | 0.7(6)   |
| F1   | 40.1(8)  | 30.3(7)  | 16.6(6)  | 4.0(5)   | 6.1(5)   | 1.5(6)   |
| F7   | 36.9(7)  | 28.3(7)  | 16.5(6)  | 3.4(5)   | 4.9(5)   | 2.6(6)   |
| F5   | 43.2(8)  | 26.4(7)  | 18.8(6)  | 2.5(5)   | 12.3(6)  | -0.3(6)  |
| O5   | 21.7(7)  | 27.2(8)  | 22.1(7)  | -0.6(6)  | 6.8(6)   | 1.2(6)   |
| O6   | 23.1(8)  | 32.7(9)  | 21.8(8)  | -0.2(6)  | 4.2(6)   | 0.3(6)   |
| O4   | 25.1(8)  | 30.5(9)  | 27.5(8)  | -0.1(7)  | 9.2(6)   | 3.5(7)   |
| O2   | 24.8(8)  | 30.1(9)  | 24.0(8)  | 1.2(6)   | 7.2(6)   | -1.1(6)  |
| O3   | 30.5(9)  | 44.3(11) | 28.1(9)  | -0.6(8)  | 2.3(7)   | -5.4(8)  |
| O1   | 33.4(9)  | 42.6(11) | 38.4(10) | 7.0(8)   | 16.2(8)  | 8.3(8)   |
| N2   | 20.9(9)  | 26.1(10) | 19.9(9)  | 2.4(7)   | 6.3(7)   | 2.1(7)   |
| N3   | 30.5(10) | 28.6(11) | 23.8(9)  | 0.7(8)   | 7.5(8)   | 0.2(8)   |
| N1   | 23.9(9)  | 30.4(10) | 22.9(9)  | 5.7(8)   | 7.3(8)   | 1.5(8)   |
| N4   | 32.5(10) | 30.9(11) | 23.9(10) | -2.8(8)  | 10.1(8)  | 0.6(8)   |
| N10  | 41.4(12) | 27.1(10) | 27.4(10) | -0.8(8)  | 15.1(9)  | -0.6(9)  |
| N8   | 36.5(11) | 31.0(11) | 24.7(10) | -3.7(8)  | 8.9(8)   | -4.1(9)  |
| N6   | 38.2(11) | 33.4(11) | 24.1(10) | -2.5(8)  | 11.1(9)  | -5.8(9)  |
| N7   | 40.5(12) | 30.7(12) | 28.5(10) | -1.7(8)  | 14.3(9)  | -3.4(9)  |
| N5   | 38.8(11) | 30.1(11) | 27.7(10) | -2.3(8)  | 11.5(9)  | -4.7(9)  |
| N9   | 50.6(13) | 28.0(11) | 24.6(10) | 1.6(8)   | 5.9(9)   | -0.3(9)  |
| C37  | 18.0(9)  | 25.0(11) | 18.9(10) | -0.5(8)  | 4.2(8)   | -1.8(8)  |
| C26  | 24.6(10) | 23.4(11) | 19.8(10) | 4.6(8)   | 5.2(8)   | 0.7(8)   |
| C19  | 24.7(10) | 23.3(11) | 18.5(10) | 2.2(8)   | 5.8(8)   | 0.4(8)   |
| C43  | 21.3(10) | 24.0(11) | 21.9(10) | 0.3(8)   | 6.0(8)   | 1.3(8)   |
| C20  | 25.0(11) | 23.6(11) | 24.6(11) | 4.1(9)   | 9.4(9)   | 2.1(9)   |
| C25  | 23.6(10) | 24.9(11) | 19.9(10) | 2.8(8)   | 7.9(8)   | 3.1(8)   |
| C38  | 24.0(10) | 20.3(10) | 20.9(10) | 1.9(8)   | 5.7(8)   | -1.1(8)  |
| C51  | 21.3(10) | 28.3(11) | 16.5(9)  | 4.2(8)   | 2.3(8)   | 1.0(9)   |
| C56  | 24.6(11) | 24.9(11) | 22.2(11) | -4.3(9)  | 5.0(9)   | -2.9(9)  |
| C39  | 22.1(10) | 26.3(11) | 16.8(9)  | 2.8(8)   | 6.5(8)   | -0.1(8)  |
| C44  | 21.7(10) | 21.9(11) | 25.4(11) | -4.6(9)  | 6.6(9)   | 0.3(8)   |
| C40  | 18.8(10) | 24.3(11) | 19.6(10) | 1.6(8)   | 5.6(8)   | -1.0(8)  |
| C55  | 22.6(10) | 24.1(11) | 20.1(10) | 1.2(8)   | 5.6(8)   | -2.4(8)  |
| C49  | 19.0(9)  | 23.1(11) | 21.1(10) | 0.5(8)   | 6.9(8)   | 0.3(8)   |
| C46  | 23.6(10) | 26.1(11) | 19.6(10) | -0.5(8)  | 6.6(8)   | -3.0(9)  |
| C58  | 21.4(10) | 23.4(11) | 21.5(10) | 1.5(8)   | 6.1(8)   | 2.7(8)   |
| C32  | 26.4(11) | 28.1(12) | 22.3(10) | 4.9(9)   | 8.4(9)   | 3.2(9)   |
| C24  | 25.0(11) | 23.2(11) | 22.9(10) | 2.3(8)   | 9.8(9)   | 2.9(8)   |
| C30  | 25.5(11) | 22.4(11) | 18.3(10) | 3.8(8)   | 6.2(8)   | -0.6(8)  |
| C54  | 23.8(10) | 25.9(11) | 15.1(9)  | 1.9(8)   | 4.9(8)   | -0.7(8)  |

**Table S3.** Anisotropic Displacement Parameters ( $\text{\AA}^2 \times 10^3$ ) for  $(\text{TOTA})_2 \cdot (\text{F}_4\text{TCNQ})_2 \cdot \text{CH}_2\text{Cl}_2$ . The Anisotropic displacement factor exponent takes the form:  $-2\pi^2[h^2a^2U_{11}+2hka*b*U_{12}+\dots]$ .

| Atom | $U_{11}$ | $U_{22}$ | $U_{33}$ | $U_{23}$ | $U_{13}$ | $U_{12}$ |
|------|----------|----------|----------|----------|----------|----------|
| C45  | 21.3(10) | 28.4(12) | 18.5(10) | 0.2(9)   | 6.2(8)   | 1.8(9)   |
| C59  | 24.0(10) | 22.4(11) | 24.5(11) | -1.3(9)  | 7.4(9)   | 0.7(8)   |
| C29  | 25.9(11) | 24.6(11) | 24.8(11) | 5.0(9)   | 10.3(9)  | 2.7(9)   |
| C41  | 22.2(10) | 20.8(10) | 22.3(10) | 3.9(8)   | 4.8(8)   | 0.8(8)   |
| C50  | 20.3(10) | 21.3(10) | 22.0(10) | 4.6(8)   | 5.3(8)   | 2.4(8)   |
| C31  | 21.3(10) | 28.2(11) | 22.5(10) | 7.2(9)   | 6.8(8)   | 2.5(9)   |
| C52  | 18.1(9)  | 23.7(11) | 19.7(10) | -0.6(8)  | 4.1(8)   | -1.1(8)  |
| C7   | 26.6(11) | 25.3(11) | 22.7(10) | 5.1(9)   | 8.9(9)   | 1.9(9)   |
| C23  | 25.7(11) | 26.1(12) | 24.8(11) | 0.9(9)   | 5.6(9)   | -0.2(9)  |
| C36  | 26.4(11) | 29.8(12) | 22.2(10) | 5.2(9)   | 8.2(9)   | 1.8(9)   |
| C8   | 27.5(11) | 23.2(11) | 21.2(10) | 4.6(8)   | 6.8(9)   | -2.4(9)  |
| C2   | 30.2(12) | 24.8(11) | 24.4(11) | 5.8(9)   | 11.4(9)  | 1.4(9)   |
| C47  | 24.8(11) | 25.9(11) | 23.7(11) | -2.5(9)  | 7.1(9)   | -4.4(9)  |
| C42  | 20.0(10) | 26.7(11) | 16.4(9)  | 3.1(8)   | 2.8(8)   | 0.8(8)   |
| C60  | 28.1(11) | 26.5(12) | 19.7(10) | -0.2(9)  | 5.3(9)   | 1.2(9)   |
| C48  | 23.8(11) | 33.0(13) | 18.0(10) | -2.5(9)  | 5.7(8)   | -2.4(9)  |
| C53  | 22.2(10) | 21.1(10) | 22.0(10) | 2.7(8)   | 5.8(8)   | -2.2(8)  |
| C1   | 29.9(12) | 25.9(11) | 23.4(11) | 5.8(9)   | 9.7(9)   | 0.5(9)   |
| C27  | 32.6(12) | 26.9(12) | 20.3(10) | 2.6(9)   | 8.4(9)   | -0.9(9)  |
| C57  | 26.4(11) | 28.5(12) | 20.9(10) | -2.2(9)  | 8.3(9)   | -2.6(9)  |
| C21  | 34.7(12) | 25.3(12) | 26.2(11) | 1.4(9)   | 11.8(10) | 3.2(9)   |
| C13  | 24.8(11) | 37.0(13) | 27.9(12) | 10.8(10) | 7.5(9)   | 1.0(10)  |
| C3   | 36.3(13) | 26.4(12) | 27.7(12) | 3.2(9)   | 10.7(10) | -3.4(10) |
| C12  | 29.2(12) | 31.1(12) | 24.2(11) | 3.9(9)   | 5.4(9)   | -3.9(10) |
| C33  | 25.4(11) | 39.1(14) | 29.1(12) | 9.6(10)  | 10.6(10) | 8.1(10)  |
| C35  | 24.7(11) | 39.0(14) | 25.9(11) | 4.8(10)  | 2.8(9)   | -1.6(10) |
| C14  | 30.5(12) | 41.5(14) | 33.6(13) | 12.9(11) | 14.3(10) | 6.6(11)  |
| C6   | 31.9(12) | 30.8(13) | 30.7(12) | 9.5(10)  | 15.0(10) | 6.3(10)  |
| C9   | 28.4(11) | 27.7(12) | 29.4(12) | 7.6(9)   | 11.2(10) | 2.8(9)   |
| C18  | 27.9(12) | 43.8(15) | 26.7(12) | 9.0(11)  | 7.0(10)  | -0.1(11) |
| C28  | 34.1(12) | 25.6(11) | 24.6(11) | 4.0(9)   | 13.8(10) | 3.4(9)   |
| C10  | 41.6(14) | 24.9(12) | 31.8(12) | 1.6(10)  | 17.8(11) | 2.5(10)  |
| C22  | 33.3(12) | 26.5(12) | 23.9(11) | -2.9(9)  | 5.7(9)   | -0.7(9)  |
| C11  | 43.0(14) | 28.2(12) | 28.1(12) | -1.3(10) | 12.8(11) | -4.8(10) |
| C4   | 52.1(16) | 30.4(13) | 24.2(12) | 4.4(10)  | 14.2(11) | -0.5(11) |
| C34  | 22.4(11) | 46.6(15) | 30.8(12) | 8.2(11)  | 5.9(10)  | 4.1(10)  |
| C5   | 50.9(15) | 28.4(13) | 31.8(13) | 5.6(10)  | 21.1(12) | 5.4(11)  |
| C17  | 31.0(13) | 64.1(19) | 30.1(13) | 9.5(13)  | 3.2(11)  | -6.8(13) |
| C15  | 28.5(13) | 60.0(18) | 37.7(14) | 19.8(13) | 12.6(11) | 10.4(12) |
| C16  | 25.9(13) | 74(2)    | 38.5(15) | 21.4(15) | 7.4(11)  | 5.3(13)  |
| C61  | 36.3(15) | 85(2)    | 36.9(15) | 10.4(16) | 10.8(12) | 16.3(15) |

**Table S4.** Bond Lengths for (TOTA)<sub>2</sub>·(F<sub>4</sub>TCNQ)<sub>2</sub>·CH<sub>2</sub>Cl<sub>2</sub>.

| Atom | Atom | Length/Å | Atom | Atom | Length/Å |
|------|------|----------|------|------|----------|
| C12  | C61  | 1.764(3) | C38  | C39  | 1.359(3) |
| C11  | C61  | 1.763(4) | C51  | C50  | 1.356(3) |
| F3   | C39  | 1.346(2) | C51  | C52  | 1.420(3) |
| F8   | C50  | 1.346(2) | C56  | C55  | 1.427(3) |
| F2   | C41  | 1.345(2) | C39  | C40  | 1.408(3) |
| F6   | C53  | 1.349(2) | C40  | C41  | 1.419(3) |
| F4   | C38  | 1.348(2) | C55  | C52  | 1.406(3) |
| F1   | C42  | 1.346(2) | C55  | C57  | 1.425(3) |
| F7   | C51  | 1.346(2) | C49  | C58  | 1.407(3) |
| F5   | C54  | 1.346(2) | C49  | C54  | 1.419(3) |
| O5   | C24  | 1.369(3) | C49  | C50  | 1.421(3) |
| O5   | C30  | 1.376(3) | C46  | C47  | 1.425(3) |
| O6   | C26  | 1.381(3) | C46  | C48  | 1.432(3) |
| O6   | C36  | 1.370(3) | C58  | C59  | 1.422(3) |
| O4   | C20  | 1.383(3) | C58  | C60  | 1.424(3) |
| O4   | C32  | 1.372(3) | C32  | C31  | 1.403(3) |
| O2   | C8   | 1.372(3) | C32  | C33  | 1.378(3) |
| O2   | C2   | 1.376(3) | C24  | C23  | 1.378(3) |
| O3   | C12  | 1.387(3) | C30  | C29  | 1.373(3) |
| O3   | C18  | 1.370(3) | C54  | C53  | 1.355(3) |
| O1   | C14  | 1.368(3) | C29  | C28  | 1.391(3) |
| O1   | C6   | 1.381(3) | C41  | C42  | 1.360(3) |
| N2   | C19  | 1.371(3) | C31  | C36  | 1.391(3) |
| N2   | C25  | 1.377(3) | C52  | C53  | 1.416(3) |
| N2   | C31  | 1.377(3) | C7   | C8   | 1.396(3) |
| N3   | C45  | 1.155(3) | C7   | C12  | 1.399(3) |
| N1   | C7   | 1.375(3) | C23  | C22  | 1.381(3) |
| N1   | C1   | 1.375(3) | C36  | C35  | 1.382(3) |
| N1   | C13  | 1.381(3) | C8   | C9   | 1.374(3) |
| N4   | C44  | 1.151(3) | C2   | C1   | 1.392(3) |
| N10  | C59  | 1.152(3) | C2   | C3   | 1.375(3) |
| N8   | C56  | 1.150(3) | C1   | C6   | 1.397(3) |
| N6   | C47  | 1.150(3) | C27  | C28  | 1.393(3) |
| N7   | C57  | 1.151(3) | C21  | C22  | 1.395(3) |
| N5   | C48  | 1.153(3) | C13  | C14  | 1.396(4) |
| N9   | C60  | 1.153(3) | C13  | C18  | 1.393(4) |
| C37  | C38  | 1.415(3) | C3   | C4   | 1.391(4) |
| C37  | C46  | 1.414(3) | C12  | C11  | 1.372(4) |
| C37  | C42  | 1.417(3) | C33  | C34  | 1.390(4) |
| C26  | C25  | 1.398(3) | C35  | C34  | 1.384(4) |
| C26  | C27  | 1.371(3) | C14  | C15  | 1.380(3) |
| C19  | C20  | 1.397(3) | C6   | C5   | 1.369(4) |
| C19  | C24  | 1.400(3) | C9   | C10  | 1.387(3) |
| C43  | C44  | 1.425(3) | C18  | C17  | 1.386(3) |
| C43  | C40  | 1.419(3) | C10  | C11  | 1.396(4) |
| C43  | C45  | 1.421(3) | C4   | C5   | 1.392(4) |
| C20  | C21  | 1.369(3) | C17  | C16  | 1.396(4) |

**Table S4.** Bond Lengths for (TOTA)<sub>2</sub>·(F<sub>4</sub>TCNQ)<sub>2</sub>·CH<sub>2</sub>Cl<sub>2</sub>.

| Atom | Atom | Length/Å | Atom       | Atom | Length/Å |     |            |
|------|------|----------|------------|------|----------|-----|------------|
| C25  | C30  | 1.395(3) | C15        | C16  | 1.377(4) |     |            |
| C58  | C49  | C50      | 123.6(2)   | C36  | C35      | C34 | 118.2(2)   |
| C54  | C49  | C50      | 112.60(19) | O1   | C14      | C13 | 121.3(2)   |
| C37  | C46  | C47      | 124.1(2)   | O1   | C14      | C15 | 119.2(2)   |
| C37  | C46  | C48      | 122.64(19) | C15  | C14      | C13 | 119.5(3)   |
| C47  | C46  | C48      | 112.62(19) | O1   | C6       | C1  | 120.6(2)   |
| C49  | C58  | C59      | 122.7(2)   | C5   | C6       | O1  | 119.2(2)   |
| C49  | C58  | C60      | 123.3(2)   | C5   | C6       | C1  | 120.2(2)   |
| C59  | C58  | C60      | 114.04(19) | C8   | C9       | C10 | 118.5(2)   |
| O4   | C32  | C31      | 121.3(2)   | O3   | C18      | C13 | 121.5(2)   |
| O4   | C32  | C33      | 119.3(2)   | O3   | C18      | C17 | 119.1(2)   |
| C33  | C32  | C31      | 119.3(2)   | C17  | C18      | C13 | 119.4(3)   |
| O5   | C24  | C19      | 121.03(19) | C29  | C28      | C27 | 122.0(2)   |
| O5   | C24  | C23      | 119.28(19) | C9   | C10      | C11 | 122.6(2)   |
| C23  | C24  | C19      | 119.7(2)   | C23  | C22      | C21 | 122.8(2)   |
| O5   | C30  | C25      | 120.78(19) | C12  | C11      | C10 | 118.1(2)   |
| C29  | C30  | O5       | 118.87(19) | C3   | C4       | C5  | 121.9(2)   |
| C29  | C30  | C25      | 120.3(2)   | C35  | C34      | C33 | 123.1(2)   |
| F5   | C54  | C49      | 118.75(18) | C6   | C5       | C4  | 118.7(2)   |
| F5   | C54  | C53      | 117.82(19) | C18  | C17      | C16 | 118.3(3)   |
| C53  | C54  | C49      | 123.36(19) | C16  | C15      | C14 | 118.8(3)   |
| N3   | C45  | C43      | 176.5(2)   | C15  | C16      | C17 | 122.7(3)   |
| N10  | C59  | C58      | 177.0(2)   | C11  | C61      | C12 | 112.15(16) |
| C30  | C29  | C28      | 118.6(2)   |      |          |     |            |

**Table S5.** Bond Angles for (TOTA)<sub>2</sub>·(F<sub>4</sub>TCNQ)<sub>2</sub>·CH<sub>2</sub>Cl<sub>2</sub>.

| Atom | Atom | Atom | Angle/°    | Atom | Atom | Atom | Angle/°    |
|------|------|------|------------|------|------|------|------------|
| C24  | O5   | C30  | 118.87(17) | F2   | C41  | C40  | 118.52(19) |
| C36  | O6   | C26  | 118.82(17) | F2   | C41  | C42  | 117.85(18) |
| C32  | O4   | C20  | 118.85(17) | C42  | C41  | C40  | 123.6(2)   |
| C8   | O2   | C2   | 118.80(17) | F8   | C50  | C51  | 117.46(18) |
| C18  | O3   | C12  | 118.70(19) | F8   | C50  | C49  | 118.63(19) |
| C14  | O1   | C6   | 118.77(19) | C51  | C50  | C49  | 123.9(2)   |
| C19  | N2   | C25  | 120.03(18) | N2   | C31  | C32  | 118.9(2)   |
| C19  | N2   | C31  | 120.43(19) | N2   | C31  | C36  | 120.0(2)   |
| C31  | N2   | C25  | 119.54(19) | C36  | C31  | C32  | 121.1(2)   |
| C7   | N1   | C13  | 120.1(2)   | C55  | C52  | C51  | 124.14(19) |
| C1   | N1   | C7   | 119.97(19) | C55  | C52  | C53  | 123.2(2)   |
| C1   | N1   | C13  | 119.9(2)   | C53  | C52  | C51  | 112.63(19) |
| C38  | C37  | C42  | 112.76(19) | N1   | C7   | C8   | 119.7(2)   |
| C46  | C37  | C38  | 122.8(2)   | N1   | C7   | C12  | 119.9(2)   |
| C46  | C37  | C42  | 124.44(19) | C8   | C7   | C12  | 120.4(2)   |
| O6   | C26  | C25  | 120.47(19) | C24  | C23  | C22  | 118.6(2)   |
| C27  | C26  | O6   | 119.5(2)   | O6   | C36  | C31  | 121.1(2)   |
| C27  | C26  | C25  | 120.0(2)   | O6   | C36  | C35  | 119.0(2)   |
| N2   | C19  | C20  | 120.1(2)   | C35  | C36  | C31  | 119.8(2)   |
| N2   | C19  | C24  | 119.5(2)   | O2   | C8   | C7   | 120.8(2)   |
| C20  | C19  | C24  | 120.4(2)   | O2   | C8   | C9   | 119.2(2)   |
| C40  | C43  | C44  | 122.0(2)   | C9   | C8   | C7   | 120.0(2)   |
| C40  | C43  | C45  | 123.66(19) | O2   | C2   | C1   | 121.0(2)   |
| C45  | C43  | C44  | 114.05(19) | C3   | C2   | O2   | 119.2(2)   |
| O4   | C20  | C19  | 120.3(2)   | C3   | C2   | C1   | 119.8(2)   |
| C21  | C20  | O4   | 119.3(2)   | N6   | C47  | C46  | 174.8(2)   |
| C21  | C20  | C19  | 120.4(2)   | F1   | C42  | C37  | 118.75(19) |
| N2   | C25  | C26  | 120.03(19) | F1   | C42  | C41  | 117.92(19) |
| N2   | C25  | C30  | 119.7(2)   | C41  | C42  | C37  | 123.30(19) |
| C30  | C25  | C26  | 120.2(2)   | N9   | C60  | C58  | 176.8(2)   |
| F4   | C38  | C37  | 118.32(19) | N5   | C48  | C46  | 175.8(2)   |
| F4   | C38  | C39  | 117.75(18) | F6   | C53  | C54  | 117.66(18) |
| C39  | C38  | C37  | 123.9(2)   | F6   | C53  | C52  | 118.20(19) |
| F7   | C51  | C50  | 117.73(19) | C54  | C53  | C52  | 124.1(2)   |
| F7   | C51  | C52  | 118.91(19) | N1   | C1   | C2   | 119.6(2)   |
| C50  | C51  | C52  | 123.36(19) | N1   | C1   | C6   | 119.9(2)   |
| N8   | C56  | C55  | 176.2(3)   | C2   | C1   | C6   | 120.5(2)   |
| F3   | C39  | C38  | 117.43(19) | C26  | C27  | C28  | 118.9(2)   |
| F3   | C39  | C40  | 119.10(19) | N7   | C57  | C55  | 176.4(2)   |
| C38  | C39  | C40  | 123.41(19) | C20  | C21  | C22  | 118.1(2)   |
| N4   | C44  | C43  | 177.5(2)   | N1   | C13  | C14  | 119.4(2)   |
| C43  | C40  | C41  | 123.6(2)   | N1   | C13  | C18  | 119.4(2)   |
| C39  | C40  | C43  | 123.38(19) | C18  | C13  | C14  | 121.2(2)   |
| C39  | C40  | C41  | 113.00(19) | C2   | C3   | C4   | 118.9(2)   |
| C52  | C55  | C56  | 122.9(2)   | O3   | C12  | C7   | 120.4(2)   |
| C52  | C55  | C57  | 122.93(19) | C11  | C12  | O3   | 119.3(2)   |
| C57  | C55  | C56  | 113.67(19) | C11  | C12  | C7   | 120.2(2)   |

**Table S5.** Bond Angles for (TOTA)<sub>2</sub>·(F<sub>4</sub>TCNQ)<sub>2</sub>·CH<sub>2</sub>Cl<sub>2</sub>.

| Atom | Atom | Atom | Angle/°    | Atom | Atom | Atom | Angle/°  |
|------|------|------|------------|------|------|------|----------|
| C58  | C49  | C54  | 123.80(19) | C32  | C33  | C34  | 118.4(2) |

**Table S6.** Crystal data and structure refinement for (TOTA)<sub>4</sub>·(F<sub>4</sub>BQ)

|                                               |                                                               |
|-----------------------------------------------|---------------------------------------------------------------|
| Empirical formula                             | C <sub>21</sub> H <sub>9</sub> F <sub>2</sub> NO <sub>4</sub> |
| Formula weight                                | 377.29                                                        |
| Temperature/K                                 | 100                                                           |
| Crystal system                                | triclinic                                                     |
| Space group                                   | $P\bar{1}$                                                    |
| $a/\text{\AA}$                                | 9.0452(6)                                                     |
| $b/\text{\AA}$                                | 10.1512(7)                                                    |
| $c/\text{\AA}$                                | 10.1574(7)                                                    |
| $\alpha/^\circ$                               | 112.442(5)                                                    |
| $\beta/^\circ$                                | 94.726(5)                                                     |
| $\gamma/^\circ$                               | 115.784(5)                                                    |
| Volume/ $\text{\AA}^3$                        | 740.80(10)                                                    |
| $Z$                                           | 2                                                             |
| $\rho_{\text{calc}}/\text{g/cm}^3$            | 1.691                                                         |
| $\mu/\text{mm}^{-1}$                          | 0.135                                                         |
| $F(000)$                                      | 384.0                                                         |
| Crystal size/ $\text{mm}^3$                   | $0.25 \times 0.217 \times 0.15$                               |
| Radiation                                     | MoK $\alpha$ ( $\lambda = 0.71073$ )                          |
| $2\theta$ range for data collection/ $^\circ$ | 4.972 to 55.152 $^\circ$                                      |
| Index ranges                                  | $-11 \leq h \leq 11, -13 \leq k \leq 13, -13 \leq l \leq 13$  |
| Reflections collected                         | 6260                                                          |
| Independent reflections                       | 3312 [ $R_{\text{int}} = 0.0201, R_{\text{sigma}} = 0.0196$ ] |
| Data/restraints/parameters                    | 3312/0/253                                                    |
| Goodness-of-fit on $F^2$                      | 1.034                                                         |
| Final R indexes [ $I \geq 2\sigma(I)$ ]       | $R_1 = 0.0382, wR_2 = 0.1005$                                 |
| Final R indexes [all data]                    | $R_1 = 0.0500, wR_2 = 0.1094$                                 |
| Largest diff. peak/hole / $e \text{\AA}^{-3}$ | 0.24/-0.27                                                    |

**Table S7.** Fractional Atomic Coordinates ( $\times 10^4$ ) and Equivalent Isotropic Displacement Parameters ( $\text{\AA}^2 \times 10^3$ ) for (TOTA)<sub>4</sub>·(F<sub>4</sub>BQ).  $U_{\text{eq}}$  is defined as 1/3 of the trace of the orthogonalised  $U_{ij}$  tensor.

| Atom | <i>x</i>   | <i>y</i>   | <i>z</i>   | $U(\text{eq})$ |
|------|------------|------------|------------|----------------|
| F2   | 7353.6(9)  | 8286.7(9)  | 1760.6(9)  | 22.96(19)      |
| F1   | 4072.4(9)  | 7332.9(9)  | 436.4(9)   | 22.81(19)      |
| O4   | 8219.1(11) | 5933.8(12) | 1352.3(11) | 22.6(2)        |
| O1   | 8378.2(11) | 5885.6(11) | 4647.9(11) | 21.7(2)        |
| O3   | 4311.8(11) | 7510.3(11) | 3583.1(10) | 21.5(2)        |
| O2   | 2662.0(11) | 1740.9(11) | 1254.8(11) | 21.4(2)        |
| N1   | 5209.6(13) | 5071.7(13) | 2943.6(12) | 18.3(2)        |
| C19  | 6760.7(16) | 5510.5(15) | 730.4(14)  | 18.7(3)        |
| C7   | 3493.4(16) | 4625.5(16) | 2459.8(14) | 18.6(3)        |
| C21  | 4565.6(16) | 6229.3(15) | 248.3(14)  | 18.6(3)        |
| C18  | 7908.5(16) | 7075.2(16) | 4912.1(14) | 19.5(3)        |
| C6   | 4265.7(16) | 2179.1(16) | 2061.5(14) | 19.7(3)        |
| C20  | 6177.1(16) | 6695.6(15) | 894.2(14)  | 18.8(3)        |
| C8   | 2236.2(16) | 2968.8(16) | 1607.8(14) | 19.6(3)        |
| C13  | 6333.3(16) | 6680.8(15) | 4099.0(14) | 18.6(3)        |
| C12  | 3057.5(16) | 5849.5(16) | 2772.7(14) | 19.4(3)        |
| C14  | 5892.1(16) | 7894.2(16) | 4388.6(14) | 19.5(3)        |
| C1   | 5521.5(16) | 3827.4(16) | 2935.5(14) | 18.8(3)        |
| C11  | 1382.0(17) | 5429.5(17) | 2226.7(15) | 22.6(3)        |
| C9   | 547.5(16)  | 2521.3(17) | 1056.2(15) | 22.9(3)        |
| C3   | 7464.9(17) | 3022.0(17) | 3653.8(15) | 22.9(3)        |
| C2   | 7107.5(16) | 4245.5(16) | 3748.1(14) | 19.3(3)        |
| C5   | 4600.7(17) | 942.0(17)  | 1936.1(15) | 22.8(3)        |
| C10  | 142.3(16)  | 3763.2(17) | 1362.4(15) | 23.7(3)        |
| C4   | 6213.2(17) | 1377.2(17) | 2730.7(16) | 24.6(3)        |
| C15  | 7032.4(17) | 9511.2(16) | 5441.5(15) | 22.1(3)        |
| C16  | 8619.3(17) | 9891.7(16) | 6235.4(15) | 23.2(3)        |
| C17  | 9056.3(16) | 8679.5(17) | 5985.3(15) | 22.3(3)        |

**Table S8.** Anisotropic Displacement Parameters ( $\text{\AA}^2 \times 10^3$ ) for (TOTA)<sub>4</sub>(F<sub>4</sub>BQ). The Anisotropic displacement factor exponent takes the form:  $-2\pi^2[h^2a^2U_{11}+2hka*b*U_{12}+\dots]$ .

| Atom | U <sub>11</sub> | U <sub>22</sub> | U <sub>33</sub> | U <sub>23</sub> | U <sub>13</sub> | U <sub>12</sub> |
|------|-----------------|-----------------|-----------------|-----------------|-----------------|-----------------|
| F2   | 17.9(4)         | 13.9(4)         | 25.8(4)         | 3.5(3)          | -0.6(3)         | 5.4(3)          |
| F1   | 21.5(4)         | 19.4(4)         | 29.3(4)         | 9.1(3)          | 4.1(3)          | 14.2(3)         |
| O4   | 15.8(4)         | 23.6(5)         | 24.9(5)         | 8.8(4)          | 1.3(3)          | 10.0(4)         |
| O1   | 15.0(4)         | 19.0(5)         | 26.2(5)         | 7.0(4)          | 0.1(3)          | 8.7(4)          |
| O3   | 17.7(5)         | 17.3(5)         | 25.0(5)         | 5.9(4)          | 0.5(4)          | 9.8(4)          |
| O2   | 17.1(4)         | 16.7(4)         | 25.4(5)         | 6.5(4)          | 0.3(4)          | 8.4(4)          |
| N1   | 15.0(5)         | 16.1(5)         | 20.6(5)         | 6.0(4)          | 1.0(4)          | 8.2(4)          |
| C19  | 15.4(6)         | 19.3(6)         | 19.3(6)         | 7.6(5)          | 2.4(5)          | 8.7(5)          |
| C7   | 15.1(6)         | 19.5(6)         | 20.0(6)         | 8.2(5)          | 3.1(5)          | 8.9(5)          |
| C21  | 19.3(6)         | 17.3(6)         | 21.2(6)         | 8.0(5)          | 4.8(5)          | 12.0(5)         |
| C18  | 17.2(6)         | 19.9(6)         | 20.7(6)         | 8.6(5)          | 4.6(5)          | 9.8(5)          |
| C6   | 16.3(6)         | 20.1(6)         | 21.2(6)         | 8.8(5)          | 3.8(5)          | 9.2(5)          |
| C20  | 16.3(6)         | 14.4(6)         | 19.6(6)         | 4.6(5)          | 2.4(5)          | 6.3(5)          |
| C8   | 18.1(6)         | 19.3(6)         | 21.8(6)         | 9.2(5)          | 4.7(5)          | 10.4(5)         |
| C13  | 15.7(6)         | 17.0(6)         | 19.2(6)         | 6.7(5)          | 3.2(5)          | 7.0(5)          |
| C12  | 17.0(6)         | 17.7(6)         | 20.2(6)         | 6.7(5)          | 3.2(5)          | 8.5(5)          |
| C14  | 15.6(6)         | 20.4(6)         | 21.2(6)         | 8.6(5)          | 3.6(5)          | 9.3(5)          |
| C1   | 18.0(6)         | 19.1(6)         | 21.5(6)         | 9.4(5)          | 5.5(5)          | 11.3(5)         |
| C11  | 18.5(6)         | 24.2(7)         | 27.2(7)         | 10.7(6)         | 5.1(5)          | 13.8(5)         |
| C9   | 16.5(6)         | 21.6(6)         | 25.5(7)         | 9.4(5)          | 2.9(5)          | 7.7(5)          |
| C3   | 20.2(6)         | 25.1(7)         | 25.7(7)         | 11.2(6)         | 4.2(5)          | 14.4(5)         |
| C2   | 16.9(6)         | 19.1(6)         | 19.9(6)         | 7.3(5)          | 4.0(5)          | 9.3(5)          |
| C5   | 22.3(7)         | 18.1(6)         | 26.1(7)         | 8.3(5)          | 5.0(5)          | 10.7(5)         |
| C10  | 15.5(6)         | 26.1(7)         | 27.4(7)         | 10.6(6)         | 3.5(5)          | 10.8(5)         |
| C4   | 24.6(7)         | 23.1(7)         | 30.4(7)         | 11.7(6)         | 7.1(5)          | 16.1(6)         |
| C15  | 21.2(6)         | 18.5(6)         | 24.3(7)         | 7.6(5)          | 5.4(5)          | 10.3(5)         |
| C16  | 19.8(6)         | 18.3(6)         | 22.8(6)         | 6.0(5)          | 3.1(5)          | 6.5(5)          |
| C17  | 16.0(6)         | 22.2(6)         | 22.7(6)         | 8.3(5)          | 1.5(5)          | 7.5(5)          |



**Table S9.** Bond Lengths for (TOTA)<sub>4</sub>·(F<sub>4</sub>BQ).

| <b>Atom Atom</b>     | <b>Length/Å</b> | <b>Atom Atom</b> | <b>Length/Å</b> |
|----------------------|-----------------|------------------|-----------------|
| F2 C20               | 1.3345(14)      | C18 C13          | 1.3892(17)      |
| F1 C21               | 1.3326(14)      | C18 C17          | 1.3804(19)      |
| O4 C19               | 1.2191(15)      | C6 C1            | 1.3872(18)      |
| O1 C18               | 1.3887(15)      | C6 C5            | 1.3785(18)      |
| O1 C2                | 1.3888(15)      | C8 C9            | 1.3837(17)      |
| O3 C12               | 1.3892(15)      | C13 C14          | 1.3905(17)      |
| O3 C14               | 1.3941(15)      | C12 C11          | 1.3803(18)      |
| O2 C6                | 1.3921(15)      | C14 C15          | 1.3809(18)      |
| O2 C8                | 1.3892(15)      | C1 C2            | 1.3883(17)      |
| N1 C7                | 1.3961(16)      | C11 C10          | 1.3940(18)      |
| N1 C13               | 1.4050(16)      | C9 C10           | 1.3935(18)      |
| N1 C1                | 1.4062(16)      | C3 C2            | 1.3855(18)      |
| C19 C21 <sup>1</sup> | 1.4718(18)      | C3 C4            | 1.3907(19)      |
| C19 C20              | 1.4724(17)      | C5 C4            | 1.3954(18)      |
| C7 C8                | 1.3903(18)      | C15 C16          | 1.3961(18)      |
| C7 C12               | 1.3948(17)      | C16 C17          | 1.3913(18)      |
| C21 C20              | 1.3358(18)      |                  |                 |

<sup>1</sup>1-X,1-Y,-Z

**Table S10.** Bond Angles for (TOTA)<sub>4</sub>·(F<sub>4</sub>BQ).

| <b>Atom</b>      | <b>Atom</b> | <b>Atom</b>      | <b>Angle/°</b> | <b>Atom</b> | <b>Atom</b> | <b>Atom</b> | <b>Angle/°</b> |
|------------------|-------------|------------------|----------------|-------------|-------------|-------------|----------------|
| C18              | O1          | C2               | 117.35(10)     | C9          | C8          | C7          | 120.37(12)     |
| C12              | O3          | C14              | 117.33(10)     | C18         | C13         | N1          | 120.16(11)     |
| C8               | O2          | C6               | 117.40(10)     | C18         | C13         | C14         | 120.05(12)     |
| C7               | N1          | C13              | 117.00(10)     | C14         | C13         | N1          | 119.74(11)     |
| C7               | N1          | C1               | 116.86(10)     | O3          | C12         | C7          | 120.63(11)     |
| C13              | N1          | C1               | 116.57(10)     | C11         | C12         | O3          | 118.92(11)     |
| O4               | C19         | C21 <sup>1</sup> | 122.81(12)     | C11         | C12         | C7          | 120.39(12)     |
| O4               | C19         | C20              | 122.86(12)     | C13         | C14         | O3          | 120.51(11)     |
| C21 <sup>1</sup> | C19         | C20              | 114.33(11)     | C15         | C14         | O3          | 118.76(11)     |
| C8               | C7          | N1               | 120.01(11)     | C15         | C14         | C13         | 120.69(12)     |
| C8               | C7          | C12              | 120.14(11)     | C6          | C1          | N1          | 119.75(11)     |
| C12              | C7          | N1               | 119.77(11)     | C6          | C1          | C2          | 120.08(12)     |
| F1               | C21         | C19 <sup>1</sup> | 115.84(11)     | C2          | C1          | N1          | 120.10(11)     |
| F1               | C21         | C20              | 121.38(11)     | C12         | C11         | C10         | 118.65(12)     |
| C20              | C21         | C19 <sup>1</sup> | 122.76(11)     | C8          | C9          | C10         | 118.63(12)     |
| O1               | C18         | C13              | 121.19(11)     | C2          | C3          | C4          | 118.89(12)     |
| C17              | C18         | O1               | 118.67(11)     | C1          | C2          | O1          | 121.24(11)     |
| C17              | C18         | C13              | 120.13(12)     | C3          | C2          | O1          | 118.50(11)     |
| C1               | C6          | O2               | 120.73(11)     | C3          | C2          | C1          | 120.25(12)     |
| C5               | C6          | O2               | 118.63(11)     | C6          | C5          | C4          | 118.79(12)     |
| C5               | C6          | C1               | 120.60(12)     | C9          | C10         | C11         | 121.80(12)     |
| F2               | C20         | C19              | 115.92(11)     | C3          | C4          | C5          | 121.31(12)     |
| F2               | C20         | C21              | 121.19(11)     | C14         | C15         | C16         | 118.53(12)     |
| C21              | C20         | C19              | 122.88(11)     | C17         | C16         | C15         | 121.30(12)     |
| O2               | C8          | C7               | 120.69(11)     | C18         | C17         | C16         | 119.26(12)     |
| C9               | C8          | O2               | 118.91(11)     |             |             |             |                |

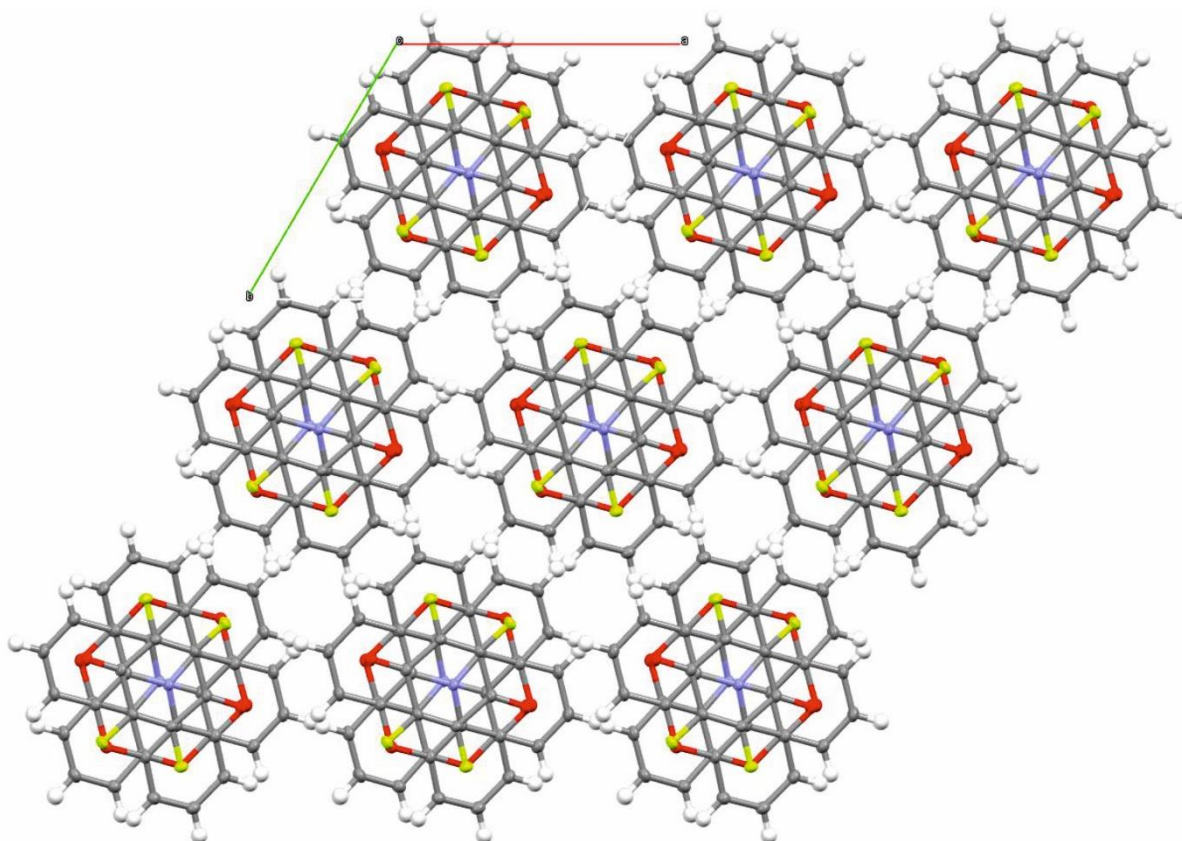

**Figure S5.** Packing of  $(\text{TOTA})_2(\text{F}_4\text{BQ})$  along the  $ab$  plane, viewing down the  $c$  axis.

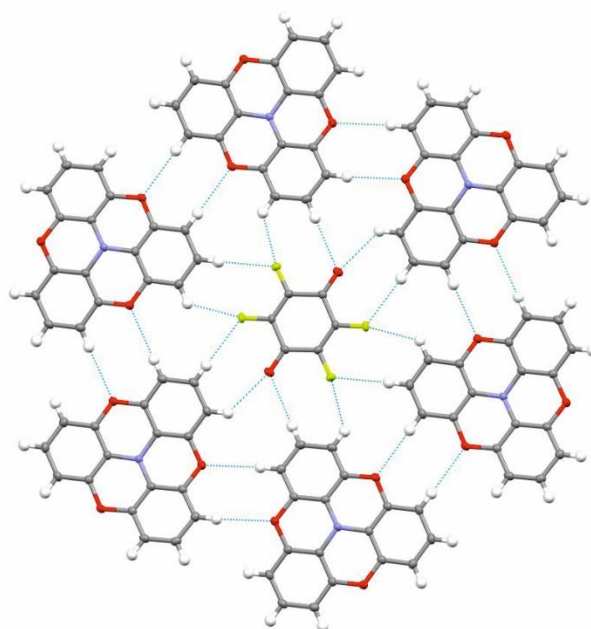

**Figure S6.** Surrounding of the  $\text{F}_4\text{BQ}$  acceptor in crystalline  $\text{TOTA}\cdot\text{F}_4\text{BQ}$  with intermolecular H-bonding interactions indicated by blue broken lines.

**Table S11.** Crystal data and structure refinement for (PAA)<sub>4</sub>·(F<sub>4</sub>TCNQ)

|                                                              |                                                                               |
|--------------------------------------------------------------|-------------------------------------------------------------------------------|
| Empirical formula                                            | C <sub>70</sub> H <sub>56</sub> F <sub>2</sub> N <sub>6</sub> Si <sub>4</sub> |
| Formula weight                                               | 1131.56                                                                       |
| Temperature/K                                                | 100                                                                           |
| Crystal system                                               | monoclinic                                                                    |
| Space group                                                  | C2/c                                                                          |
| <i>a</i> /Å                                                  | 26.921(4)                                                                     |
| <i>b</i> /Å                                                  | 19.255(2)                                                                     |
| <i>c</i> /Å                                                  | 25.544(3)                                                                     |
| $\alpha$ /°                                                  | 90                                                                            |
| $\beta$ /°                                                   | 101.364(12)                                                                   |
| $\gamma$ /°                                                  | 90                                                                            |
| Volume/Å <sup>3</sup>                                        | 12982(3)                                                                      |
| <i>Z</i>                                                     | 8                                                                             |
| $\rho_{\text{calc}}$ g/cm <sup>3</sup>                       | 1.158                                                                         |
| $\mu$ /mm <sup>-1</sup>                                      | 1.248                                                                         |
| <i>F</i> (000)                                               | 4736.0                                                                        |
| Crystal size/mm <sup>3</sup>                                 | 0.1 × 0.06 × 0.04                                                             |
| Radiation                                                    | Cu K $\alpha$ ( $\lambda$ = 1.54186)                                          |
| 2 $\Theta$ range for data collection/°                       | 6.698 to 135.288°                                                             |
| Index ranges                                                 | -32 ≤ <i>h</i> ≤ 30, -21 ≤ <i>k</i> ≤ 22, -26 ≤ <i>l</i> ≤ 30                 |
| Reflections collected                                        | 45229                                                                         |
| Independent reflections                                      | 11390 [ <i>R</i> <sub>int</sub> = 0.1041, <i>R</i> <sub>sigma</sub> = 0.0952] |
| Data/restraints/parameters                                   | 11390/30/751                                                                  |
| Goodness-of-fit on <i>F</i> <sup>2</sup>                     | 1.033                                                                         |
| Final <i>R</i> indexes [ <i>I</i> ≥ 2 $\sigma$ ( <i>I</i> )] | <i>R</i> <sub>1</sub> = 0.0835, w <i>R</i> <sub>2</sub> = 0.1720              |
| Final <i>R</i> indexes [all data]                            | <i>R</i> <sub>1</sub> = 0.1707, w <i>R</i> <sub>2</sub> = 0.2267              |
| Largest diff. peak/hole / e Å <sup>-3</sup>                  | 0.38/-0.47                                                                    |

**Table S12.** Fractional Atomic Coordinates ( $\times 10^4$ ) and Equivalent Isotropic Displacement Parameters ( $\text{\AA}^2 \times 10^3$ ) for (PAA)<sub>4</sub>·(F<sub>4</sub>TCNQ).  $U_{\text{eq}}$  is defined as 1/3 of the trace of the orthogonalised  $U_{\text{ij}}$  tensor.

| Atom | <i>x</i>   | <i>y</i>   | <i>z</i>   | $U(\text{eq})$ |
|------|------------|------------|------------|----------------|
| Si2  | 2386.0(6)  | 5131.9(9)  | 6537.5(7)  | 36.0(4)        |
| Si4  | 5834.3(7)  | 2201.3(10) | 3305.4(7)  | 39.8(4)        |
| Si1  | 5490.4(7)  | 792.5(10)  | 6746.9(7)  | 44.0(5)        |
| Si3  | 2783.0(7)  | 6586.5(10) | 3270.7(7)  | 40.2(5)        |
| F2   | 1937.9(11) | 3652.9(16) | 5090.6(12) | 31.2(7)        |
| F1   | 2404.3(11) | 3026.2(16) | 5963.4(12) | 30.9(7)        |
| N4   | 4202.7(14) | 2460(2)    | 5789.3(16) | 20.4(10)       |
| N6   | 4097.0(14) | 4908(2)    | 4214.3(16) | 20.5(9)        |
| N3   | 3525.0(15) | 3588(2)    | 5745.5(16) | 21.9(10)       |
| N5   | 4776.9(15) | 3781(2)    | 4222.4(16) | 20.2(9)        |
| C19  | 4052.3(18) | 2408(3)    | 4832(2)    | 22.7(12)       |
| C32  | 4373(2)    | 1837(3)    | 4838(2)    | 26.5(13)       |
| C17  | 3632.5(17) | 3305(3)    | 5304.9(19) | 18.3(11)       |
| C9   | 3656.2(18) | 3607(3)    | 6700.0(19) | 19.9(11)       |
| C70  | 2211.4(19) | 3078(3)    | 5040(2)    | 25.4(12)       |
| C41  | 3914.1(18) | 4889(3)    | 3252.8(19) | 21.4(11)       |
| C10  | 3763.7(18) | 3320(3)    | 6220(2)    | 20.6(11)       |
| C51  | 4952.5(18) | 3766(3)    | 5185(2)    | 19.6(11)       |
| C29  | 3879(2)    | 2373(3)    | 3851(2)    | 25.9(12)       |
| N2   | 3584(2)    | 743(3)     | 6004(2)    | 49.3(15)       |
| C7   | 4256.3(18) | 2789(3)    | 7208(2)    | 23.0(12)       |
| C60  | 5029(2)    | 4074(3)    | 6654(2)    | 25.9(12)       |
| C39  | 4359.0(18) | 4066(3)    | 2787(2)    | 22.1(12)       |
| C38  | 4616.0(18) | 3792(3)    | 3264.4(19) | 19.8(11)       |
| C6   | 4362.0(18) | 2499(3)    | 6749(2)    | 20.7(11)       |
| C57  | 4098(2)    | 5468(3)    | 6137(2)    | 25.2(12)       |
| C58  | 4435.8(19) | 4908(3)    | 6153(2)    | 24.8(12)       |
| C64  | 5279.7(19) | 3209(3)    | 5205(2)    | 24.3(12)       |
| C26  | 3226.5(19) | 3540(3)    | 3809(2)    | 25.1(12)       |
| C54  | 4263.5(18) | 4930(3)    | 5175.5(19) | 19.8(11)       |
| C5   | 4720.4(19) | 1947(3)    | 6765(2)    | 23.2(12)       |
| C40  | 4005.4(18) | 4610(3)    | 2784(2)    | 27.2(13)       |
| C42  | 4183.5(18) | 4625(3)    | 3754(2)    | 20.5(11)       |
| C62  | 5446.5(19) | 3213(3)    | 6158(2)    | 27.5(13)       |
| C55  | 3932.5(19) | 5483(3)    | 5181(2)    | 23.2(12)       |
| C22  | 3388.8(18) | 3591(3)    | 4792(2)    | 20.3(11)       |
| C61  | 5113.9(19) | 3784(3)    | 6162(2)    | 24.1(12)       |
| C13  | 2946(2)    | 4571(3)    | 6621(2)    | 30.0(13)       |
| C18  | 3968.2(17) | 2721(3)    | 5326(2)    | 19.7(11)       |
| C52  | 4858.9(18) | 4062(3)    | 5663(2)    | 21.2(11)       |
| C12  | 3279.7(18) | 4138(3)    | 6668(2)    | 22.7(12)       |
| C49  | 4349.6(17) | 4632(3)    | 4666.0(19) | 19.4(11)       |
| C23  | 3074.4(19) | 4179(3)    | 4753(2)    | 25.3(12)       |
| C36  | 5294(2)    | 2794(3)    | 3268(2)    | 31.0(13)       |
| C50  | 4689.7(17) | 4060(3)    | 4674.7(19) | 18.0(11)       |
| C8   | 3902.3(18) | 3339(3)    | 7183(2)    | 24.3(12)       |

**Table S12.** Fractional Atomic Coordinates ( $\times 10^4$ ) and Equivalent Isotropic Displacement Parameters ( $\text{\AA}^2 \times 10^3$ ) for  $(\text{PAA})_4 \cdot (\text{F}_4\text{TCNQ})$ .  $U_{\text{eq}}$  is defined as 1/3 of the trace of the orthogonalised  $U_{\text{ij}}$  tensor.

| Atom | <i>x</i>   | <i>y</i> | <i>z</i>   | $U(\text{eq})$ |
|------|------------|----------|------------|----------------|
| C53  | 4520.3(18) | 4634(3)  | 5660.4(19) | 19.9(11)       |
| C67  | 2979.6(19) | 2048(3)  | 6483(2)    | 29.1(13)       |
| C59  | 4699.6(19) | 4608(3)  | 6648(2)    | 24.6(12)       |
| C20  | 3799.9(18) | 2682(3)  | 4337.3(19) | 21.1(11)       |
| C68  | 2764.9(18) | 2156(3)  | 5489(2)    | 23.4(12)       |
| C69  | 2450.2(19) | 2769(3)  | 5490(2)    | 23.1(12)       |
| C11  | 4108.9(17) | 2762(3)  | 6241.9(18) | 18.4(11)       |
| C21  | 3467.4(18) | 3271(3)  | 4312(2)    | 23.8(12)       |
| C56  | 3854(2)    | 5749(3)  | 5663(2)    | 28.0(13)       |
| C25  | 2915.1(19) | 4128(3)  | 3793(2)    | 27.9(13)       |
| C28  | 3623(2)    | 2659(3)  | 3355(2)    | 32.9(14)       |
| C24  | 2845.7(19) | 4445(3)  | 4264(2)    | 28.2(13)       |
| C63  | 5525(2)    | 2937(3)  | 5685(2)    | 29.4(13)       |
| C31  | 4456(2)    | 1542(3)  | 4369(2)    | 34.6(14)       |
| C4   | 5032(2)    | 1489(3)  | 6781(2)    | 29.2(13)       |
| C66  | 3012(2)    | 1833(3)  | 5950(2)    | 27.7(13)       |
| C27  | 3311(2)    | 3212(3)  | 3330(2)    | 29.6(13)       |
| C37  | 4985(2)    | 3244(3)  | 3270(2)    | 25.1(12)       |
| C45  | 3255(2)    | 5902(3)  | 3249(2)    | 30.5(13)       |
| C43  | 4530.4(17) | 4065(3)  | 3762.4(19) | 17.8(11)       |
| C44  | 3559.5(19) | 5443(3)  | 3251(2)    | 24.2(12)       |
| C30  | 4213(2)    | 1807(3)  | 3884(2)    | 32.7(14)       |
| C48  | 2482(3)    | 6392(4)  | 3853(3)    | 69(2)          |
| C65  | 3327(2)    | 1225(3)  | 5952(2)    | 37.2(15)       |
| C33  | 6398(2)    | 2755(3)  | 3296(3)    | 46.7(17)       |
| C35  | 5719(3)    | 1606(4)  | 2719(3)    | 54.8(19)       |
| C46  | 3113(3)    | 7428(4)  | 3351(3)    | 60(2)          |
| C16  | 2418(3)    | 5624(4)  | 7167(3)    | 59(2)          |
| C34  | 5892(3)    | 1691(5)  | 3931(3)    | 83(3)          |
| C15  | 1821(2)    | 4560(4)  | 6393(3)    | 57(2)          |
| C47  | 2312(2)    | 6570(4)  | 2631(3)    | 55(2)          |
| C3   | 5977(3)    | 781(4)   | 7369(3)    | 64(2)          |
| C2   | 5136(4)    | -38(4)   | 6665(4)    | 85(3)          |
| C14  | 2398(3)    | 5728(4)  | 5966(3)    | 75(3)          |
| C1   | 5772(4)    | 999(5)   | 6156(4)    | 109(4)         |
| N1   | 2974.1(19) | 2167(3)  | 6924(2)    | 40.7(13)       |

**Table S13.** Anisotropic Displacement Parameters ( $\text{\AA}^2 \times 10^3$ ) for (PAA)<sub>4</sub>·(F<sub>4</sub>TCNQ). The Anisotropic displacement factor exponent takes the form:  $-2\pi^2[h^2a^{*2}U_{11}+2hka^*b^*U_{12}+\dots]$ .

| Atom | U <sub>11</sub> | U <sub>22</sub> | U <sub>33</sub> | U <sub>23</sub> | U <sub>13</sub> | U <sub>12</sub> |
|------|-----------------|-----------------|-----------------|-----------------|-----------------|-----------------|
| Si2  | 33.1(9)         | 38.9(10)        | 36.4(10)        | -1.7(8)         | 7.5(7)          | 13.5(8)         |
| Si4  | 42.9(10)        | 41.1(11)        | 38.0(10)        | 4.9(8)          | 14.8(8)         | 18.8(8)         |
| Si1  | 58.0(11)        | 39.5(11)        | 37.2(10)        | 5.5(8)          | 15.7(8)         | 23.9(9)         |
| Si3  | 43.4(10)        | 48.3(11)        | 28.3(9)         | 5.6(8)          | 5.7(7)          | 24.0(9)         |
| F2   | 34.9(17)        | 28.1(18)        | 31.4(18)        | -3.5(14)        | 8.3(14)         | 0.7(14)         |
| F1   | 36.7(18)        | 33.4(19)        | 23.9(17)        | -3.8(14)        | 9.3(13)         | -4.0(15)        |
| N4   | 18(2)           | 28(3)           | 16(2)           | -2.4(19)        | 2.8(17)         | -5.5(18)        |
| N6   | 17(2)           | 27(3)           | 17(2)           | 1.8(19)         | 1.9(16)         | -1.4(18)        |
| N3   | 23(2)           | 21(2)           | 22(2)           | -4.3(19)        | 4.6(18)         | -3.8(18)        |
| N5   | 19(2)           | 20(2)           | 22(2)           | 0.0(19)         | 4.9(17)         | -2.9(18)        |
| C19  | 23(3)           | 27(3)           | 19(3)           | -2(2)           | 6(2)            | -7(2)           |
| C32  | 34(3)           | 31(3)           | 14(3)           | -9(2)           | 3(2)            | 1(3)            |
| C17  | 18(2)           | 20(3)           | 17(3)           | 0(2)            | 1.6(19)         | -7(2)           |
| C9   | 17(2)           | 26(3)           | 17(3)           | -5(2)           | 3.8(19)         | -1(2)           |
| C70  | 21(3)           | 22(3)           | 34(3)           | -1(2)           | 7(2)            | -3(2)           |
| C41  | 23(3)           | 25(3)           | 17(3)           | -3(2)           | 7(2)            | -3(2)           |
| C10  | 21(2)           | 21(3)           | 20(3)           | -2(2)           | 3(2)            | -4(2)           |
| C51  | 18(2)           | 20(3)           | 21(3)           | 2(2)            | 3(2)            | -4(2)           |
| C29  | 31(3)           | 25(3)           | 23(3)           | -4(2)           | 7(2)            | -9(2)           |
| N2   | 53(3)           | 46(4)           | 47(4)           | 4(3)            | 5(3)            | 8(3)            |
| C7   | 22(3)           | 26(3)           | 22(3)           | -3(2)           | 5(2)            | -3(2)           |
| C60  | 35(3)           | 29(3)           | 14(3)           | 7(2)            | 4(2)            | -7(3)           |
| C39  | 22(3)           | 30(3)           | 15(3)           | -1(2)           | 6(2)            | 3(2)            |
| C38  | 25(3)           | 17(3)           | 17(3)           | -2(2)           | 4(2)            | -3(2)           |
| C6   | 21(2)           | 23(3)           | 18(3)           | -4(2)           | 3(2)            | -1(2)           |
| C57  | 33(3)           | 24(3)           | 21(3)           | -6(2)           | 10(2)           | 1(2)            |
| C58  | 25(3)           | 30(3)           | 19(3)           | 0(2)            | 2(2)            | -9(2)           |
| C64  | 29(3)           | 27(3)           | 17(3)           | 1(2)            | 3(2)            | -3(2)           |
| C26  | 24(3)           | 33(3)           | 18(3)           | 2(2)            | 1(2)            | -7(2)           |
| C54  | 20(3)           | 24(3)           | 16(3)           | -2(2)           | 4.5(19)         | -2(2)           |
| C5   | 27(3)           | 25(3)           | 17(3)           | 0(2)            | 3(2)            | 1(2)            |
| C40  | 19(3)           | 36(3)           | 27(3)           | 4(3)            | 4(2)            | -3(2)           |
| C42  | 19(2)           | 20(3)           | 22(3)           | 1(2)            | 4(2)            | 1(2)            |
| C62  | 27(3)           | 30(3)           | 24(3)           | 11(2)           | 1(2)            | 1(2)            |
| C55  | 26(3)           | 20(3)           | 24(3)           | 3(2)            | 5(2)            | 2(2)            |
| C22  | 20(2)           | 19(3)           | 22(3)           | 4(2)            | 3(2)            | -2(2)           |
| C61  | 26(3)           | 28(3)           | 18(3)           | 4(2)            | 4(2)            | -6(2)           |
| C13  | 33(3)           | 36(3)           | 20(3)           | -7(3)           | 5(2)            | -6(3)           |
| C18  | 15(2)           | 22(3)           | 22(3)           | 1(2)            | 4.3(19)         | -3(2)           |
| C52  | 24(3)           | 18(3)           | 21(3)           | -1(2)           | 4(2)            | -5(2)           |
| C12  | 20(3)           | 30(3)           | 19(3)           | -3(2)           | 6(2)            | 3(2)            |
| C49  | 15(2)           | 22(3)           | 20(3)           | -4(2)           | 2(2)            | -5(2)           |
| C23  | 26(3)           | 25(3)           | 25(3)           | 2(2)            | 6(2)            | -6(2)           |
| C36  | 45(3)           | 32(3)           | 16(3)           | -4(2)           | 5(2)            | -2(3)           |
| C50  | 18(2)           | 18(3)           | 17(3)           | 7(2)            | 2.6(19)         | -3(2)           |
| C8   | 18(3)           | 34(3)           | 21(3)           | -4(2)           | 5(2)            | -6(2)           |

**Table S13.** Anisotropic Displacement Parameters ( $\text{\AA}^2 \times 10^3$ ) for (PAA)<sub>4</sub>·(F<sub>4</sub>TCNQ). The Anisotropic displacement factor exponent takes the form:  $-2\pi^2[h^2a^*2U_{11}+2hka^*b^*U_{12}+\dots]$ .

| Atom | U <sub>11</sub> | U <sub>22</sub> | U <sub>33</sub> | U <sub>23</sub> | U <sub>13</sub> | U <sub>12</sub> |
|------|-----------------|-----------------|-----------------|-----------------|-----------------|-----------------|
| C53  | 25(3)           | 22(3)           | 12(3)           | 0(2)            | 4(2)            | -7(2)           |
| C67  | 24(3)           | 33(3)           | 28(3)           | 0(3)            | 0(2)            | -8(2)           |
| C59  | 28(3)           | 27(3)           | 19(3)           | -3(2)           | 6(2)            | -7(2)           |
| C20  | 23(3)           | 23(3)           | 17(3)           | 0(2)            | 5(2)            | -6(2)           |
| C68  | 21(3)           | 23(3)           | 27(3)           | -3(2)           | 7(2)            | -3(2)           |
| C69  | 24(3)           | 25(3)           | 22(3)           | -7(2)           | 7(2)            | -5(2)           |
| C11  | 19(2)           | 24(3)           | 13(3)           | 0(2)            | 4.3(19)         | -3(2)           |
| C21  | 22(3)           | 28(3)           | 20(3)           | 2(2)            | 2(2)            | -9(2)           |
| C56  | 32(3)           | 27(3)           | 26(3)           | -6(2)           | 9(2)            | 3(2)            |
| C25  | 24(3)           | 30(3)           | 26(3)           | 6(3)            | -3(2)           | -10(2)          |
| C28  | 29(3)           | 50(4)           | 20(3)           | -4(3)           | 6(2)            | -12(3)          |
| C24  | 23(3)           | 32(3)           | 29(3)           | 5(3)            | 4(2)            | -5(2)           |
| C63  | 29(3)           | 31(3)           | 26(3)           | 7(3)            | 1(2)            | 6(2)            |
| C31  | 35(3)           | 42(4)           | 28(3)           | -8(3)           | 9(2)            | 7(3)            |
| C4   | 36(3)           | 31(3)           | 20(3)           | 3(3)            | 4(2)            | -2(3)           |
| C66  | 25(3)           | 28(3)           | 29(3)           | 1(2)            | 3(2)            | -9(2)           |
| C27  | 26(3)           | 43(4)           | 18(3)           | -2(3)           | 2(2)            | -9(3)           |
| C37  | 33(3)           | 19(3)           | 24(3)           | -5(2)           | 7(2)            | 0(2)            |
| C45  | 38(3)           | 36(4)           | 18(3)           | 7(3)            | 6(2)            | 0(3)            |
| C43  | 16(2)           | 17(3)           | 20(3)           | 0(2)            | 3.1(19)         | 0(2)            |
| C44  | 27(3)           | 27(3)           | 19(3)           | 10(2)           | 5(2)            | 1(2)            |
| C30  | 39(3)           | 39(4)           | 24(3)           | -11(3)          | 15(2)           | -8(3)           |
| C48  | 71(5)           | 89(6)           | 50(5)           | 14(4)           | 24(4)           | 44(5)           |
| C65  | 33(3)           | 39(4)           | 37(4)           | 6(3)            | -1(3)           | -3(3)           |
| C33  | 37(3)           | 51(4)           | 48(4)           | -13(3)          | -1(3)           | 18(3)           |
| C35  | 56(4)           | 46(4)           | 71(5)           | -8(4)           | 36(4)           | 4(3)            |
| C46  | 77(5)           | 61(5)           | 38(4)           | 3(4)            | 3(4)            | 31(4)           |
| C16  | 55(4)           | 56(5)           | 69(5)           | -25(4)          | 15(4)           | 10(4)           |
| C34  | 84(6)           | 106(7)          | 68(6)           | 39(5)           | 35(5)           | 58(6)           |
| C15  | 40(4)           | 59(5)           | 69(5)           | -10(4)          | 1(3)            | 17(3)           |
| C47  | 47(4)           | 73(5)           | 44(4)           | 4(4)            | 11(3)           | 24(4)           |
| C3   | 51(4)           | 69(5)           | 72(4)           | 6(4)            | 16(3)           | 23(4)           |
| C2   | 108(6)          | 47(5)           | 92(7)           | -16(4)          | -3(5)           | 17(4)           |
| C14  | 65(5)           | 81(6)           | 86(6)           | 33(5)           | 28(5)           | 40(5)           |
| C1   | 139(8)          | 117(8)          | 89(5)           | 60(6)           | 72(6)           | 97(6)           |
| N1   | 45(3)           | 50(4)           | 27(3)           | 4(3)            | 8(2)            | -10(3)          |



**Table S14.** Bond Lengths for (PAA)<sub>4</sub>·(F<sub>4</sub>TCNQ).

| Atom | Atom             | Length/Å | Atom | Atom | Length/Å |
|------|------------------|----------|------|------|----------|
| Si2  | C13              | 1.833(6) | C29  | C30  | 1.403(8) |
| Si2  | C16              | 1.854(7) | N2   | C65  | 1.149(8) |
| Si2  | C15              | 1.854(7) | C7   | C6   | 1.377(7) |
| Si2  | C14              | 1.862(8) | C7   | C8   | 1.418(7) |
| Si4  | C36              | 1.836(6) | C60  | C61  | 1.434(7) |
| Si4  | C33              | 1.859(7) | C60  | C59  | 1.356(7) |
| Si4  | C35              | 1.863(7) | C39  | C38  | 1.384(7) |
| Si4  | C34              | 1.855(7) | C39  | C40  | 1.414(7) |
| Si1  | C4               | 1.835(6) | C38  | C37  | 1.448(7) |
| Si1  | C3               | 1.849(7) | C38  | C43  | 1.436(7) |
| Si1  | C2               | 1.852(9) | C6   | C5   | 1.430(7) |
| Si1  | C1               | 1.862(8) | C6   | C11  | 1.431(7) |
| Si3  | C45              | 1.839(6) | C57  | C58  | 1.405(7) |
| Si3  | C48              | 1.866(7) | C57  | C56  | 1.368(7) |
| Si3  | C46              | 1.841(8) | C58  | C53  | 1.424(7) |
| Si3  | C47              | 1.861(7) | C58  | C59  | 1.443(7) |
| F2   | C70              | 1.350(6) | C64  | C63  | 1.376(7) |
| F1   | C69              | 1.335(6) | C26  | C21  | 1.418(7) |
| N4   | C18              | 1.325(6) | C26  | C25  | 1.405(8) |
| N4   | C11              | 1.361(6) | C26  | C27  | 1.435(7) |
| N6   | C42              | 1.358(6) | C54  | C55  | 1.390(7) |
| N6   | C49              | 1.329(6) | C54  | C49  | 1.482(7) |
| N3   | C17              | 1.332(6) | C54  | C53  | 1.414(7) |
| N3   | C10              | 1.358(6) | C5   | C4   | 1.214(7) |
| N5   | C50              | 1.336(6) | C42  | C43  | 1.424(7) |
| N5   | C43              | 1.346(6) | C62  | C61  | 1.418(7) |
| C19  | C32              | 1.395(7) | C62  | C63  | 1.374(8) |
| C19  | C18              | 1.457(7) | C55  | C56  | 1.388(7) |
| C19  | C20              | 1.413(7) | C22  | C23  | 1.405(7) |
| C32  | C31              | 1.383(7) | C22  | C21  | 1.424(7) |
| C17  | C22              | 1.454(7) | C61  | C52  | 1.428(7) |
| C17  | C18              | 1.438(7) | C13  | C12  | 1.214(7) |
| C9   | C10              | 1.425(7) | C52  | C53  | 1.428(7) |
| C9   | C12              | 1.430(7) | C49  | C50  | 1.430(7) |
| C9   | C8               | 1.381(7) | C23  | C24  | 1.379(7) |
| C70  | C68 <sup>1</sup> | 1.438(7) | C36  | C37  | 1.201(7) |
| C70  | C69              | 1.340(7) | C67  | C66  | 1.441(8) |
| C41  | C40              | 1.377(7) | C67  | N1   | 1.154(7) |
| C41  | C42              | 1.434(7) | C20  | C21  | 1.439(7) |
| C41  | C44              | 1.431(7) | C68  | C69  | 1.453(7) |
| C10  | C11              | 1.415(7) | C68  | C66  | 1.381(7) |
| C51  | C64              | 1.383(7) | C25  | C24  | 1.394(8) |
| C51  | C52              | 1.416(7) | C28  | C27  | 1.351(8) |
| C51  | C50              | 1.468(7) | C31  | C30  | 1.381(8) |
| C29  | C20              | 1.431(7) | C66  | C65  | 1.446(8) |
| C29  | C28              | 1.429(7) | C45  | C44  | 1.205(7) |

<sup>1</sup>1/2-X,1/2-Y,1-Z

**Table S15.** Bond Angles for (PAA)<sub>4</sub>·(F<sub>4</sub>TCNQ).

| <b>Atom</b> | <b>Atom</b> | <b>Atom</b>      | <b>Angle/°</b> | <b>Atom</b>      | <b>Atom</b> | <b>Atom</b>      | <b>Angle/°</b> |
|-------------|-------------|------------------|----------------|------------------|-------------|------------------|----------------|
| C13         | Si2         | C16              | 107.6(3)       | C55              | C54         | C53              | 120.3(5)       |
| C13         | Si2         | C15              | 107.3(3)       | C53              | C54         | C49              | 118.6(5)       |
| C13         | Si2         | C14              | 108.3(3)       | C4               | C5          | C6               | 178.7(6)       |
| C16         | Si2         | C15              | 111.8(3)       | C41              | C40         | C39              | 121.4(5)       |
| C16         | Si2         | C14              | 111.1(4)       | N6               | C42         | C41              | 119.2(4)       |
| C15         | Si2         | C14              | 110.5(4)       | N6               | C42         | C43              | 121.0(4)       |
| C36         | Si4         | C33              | 106.5(3)       | C43              | C42         | C41              | 119.8(5)       |
| C36         | Si4         | C35              | 109.6(3)       | C63              | C62         | C61              | 120.9(5)       |
| C36         | Si4         | C34              | 107.8(3)       | C56              | C55         | C54              | 120.0(5)       |
| C33         | Si4         | C35              | 110.5(3)       | C23              | C22         | C17              | 121.8(5)       |
| C34         | Si4         | C33              | 112.6(4)       | C23              | C22         | C21              | 118.6(5)       |
| C34         | Si4         | C35              | 109.8(4)       | C21              | C22         | C17              | 119.7(5)       |
| C4          | Si1         | C3               | 109.7(3)       | C62              | C61         | C60              | 121.3(5)       |
| C4          | Si1         | C2               | 107.4(3)       | C62              | C61         | C52              | 118.5(5)       |
| C4          | Si1         | C1               | 105.5(3)       | C52              | C61         | C60              | 120.2(5)       |
| C3          | Si1         | C2               | 110.4(4)       | C12              | C13         | Si2              | 172.7(5)       |
| C3          | Si1         | C1               | 111.5(4)       | N4               | C18         | C19              | 119.3(5)       |
| C2          | Si1         | C1               | 112.1(5)       | N4               | C18         | C17              | 121.0(5)       |
| C45         | Si3         | C48              | 106.9(3)       | C17              | C18         | C19              | 119.6(4)       |
| C45         | Si3         | C46              | 108.2(3)       | C51              | C52         | C61              | 118.9(5)       |
| C45         | Si3         | C47              | 108.4(3)       | C51              | C52         | C53              | 121.9(5)       |
| C46         | Si3         | C48              | 111.4(4)       | C53              | C52         | C61              | 119.2(5)       |
| C46         | Si3         | C47              | 110.1(3)       | C13              | C12         | C9               | 176.9(6)       |
| C47         | Si3         | C48              | 111.5(3)       | N6               | C49         | C54              | 117.8(4)       |
| C18         | N4          | C11              | 117.5(4)       | N6               | C49         | C50              | 122.5(5)       |
| C49         | N6          | C42              | 116.5(4)       | C50              | C49         | C54              | 119.7(4)       |
| C17         | N3          | C10              | 117.2(4)       | C24              | C23         | C22              | 121.2(5)       |
| C50         | N5          | C43              | 116.9(4)       | C37              | C36         | Si4              | 171.7(5)       |
| C32         | C19         | C18              | 121.1(5)       | N5               | C50         | C51              | 118.5(4)       |
| C32         | C19         | C20              | 119.5(5)       | N5               | C50         | C49              | 121.1(4)       |
| C20         | C19         | C18              | 119.4(5)       | C49              | C50         | C51              | 120.4(5)       |
| C31         | C32         | C19              | 121.3(5)       | C9               | C8          | C7               | 121.2(5)       |
| N3          | C17         | C22              | 118.2(5)       | C58              | C53         | C52              | 119.6(5)       |
| N3          | C17         | C18              | 121.8(4)       | C54              | C53         | C58              | 119.3(5)       |
| C18         | C17         | C22              | 119.9(5)       | C54              | C53         | C52              | 121.1(5)       |
| C10         | C9          | C12              | 119.3(4)       | N1               | C67         | C66              | 174.1(7)       |
| C8          | C9          | C10              | 118.7(5)       | C60              | C59         | C58              | 121.4(5)       |
| C8          | C9          | C12              | 121.9(5)       | C19              | C20         | C29              | 119.5(5)       |
| F2          | C70         | C68 <sup>1</sup> | 118.2(5)       | C19              | C20         | C21              | 121.4(5)       |
| C69         | C70         | F2               | 117.5(5)       | C29              | C20         | C21              | 119.1(5)       |
| C69         | C70         | C68 <sup>1</sup> | 124.4(5)       | C70 <sup>1</sup> | C68         | C69              | 112.9(5)       |
| C40         | C41         | C42              | 119.4(5)       | C66              | C68         | C70 <sup>1</sup> | 124.0(5)       |
| C40         | C41         | C44              | 121.4(5)       | C66              | C68         | C69              | 123.2(5)       |
| C44         | C41         | C42              | 119.1(5)       | F1               | C69         | C70              | 119.8(5)       |
| N3          | C10         | C9               | 118.7(5)       | F1               | C69         | C68              | 117.5(5)       |
| N3          | C10         | C11              | 121.0(5)       | C70              | C69         | C68              | 122.7(5)       |
| C11         | C10         | C9               | 120.3(5)       | N4               | C11         | C10              | 121.4(4)       |

**Table S15.** Bond Angles for (PAA)<sub>4</sub>·(F<sub>4</sub>TCNQ).

| <b>Atom</b> | <b>Atom</b> | <b>Atom</b> | <b>Angle/°</b> | <b>Atom</b> | <b>Atom</b> | <b>Atom</b> | <b>Angle/°</b> |
|-------------|-------------|-------------|----------------|-------------|-------------|-------------|----------------|
| C64         | C51         | C52         | 120.0(5)       | N4          | C11         | C6          | 118.9(5)       |
| C64         | C51         | C50         | 121.6(5)       | C10         | C11         | C6          | 119.7(4)       |
| C52         | C51         | C50         | 118.3(5)       | C26         | C21         | C22         | 120.1(5)       |
| C28         | C29         | C20         | 118.8(5)       | C26         | C21         | C20         | 119.9(5)       |
| C30         | C29         | C20         | 118.3(5)       | C22         | C21         | C20         | 119.9(5)       |
| C30         | C29         | C28         | 122.9(5)       | C57         | C56         | C55         | 120.5(5)       |
| C6          | C7          | C8          | 121.0(5)       | C24         | C25         | C26         | 120.6(5)       |
| C59         | C60         | C61         | 120.2(5)       | C27         | C28         | C29         | 122.2(5)       |
| C38         | C39         | C40         | 120.4(5)       | C23         | C24         | C25         | 120.5(5)       |
| C39         | C38         | C37         | 120.6(5)       | C62         | C63         | C64         | 120.4(5)       |
| C39         | C38         | C43         | 120.1(5)       | C30         | C31         | C32         | 119.8(6)       |
| C43         | C38         | C37         | 119.2(5)       | C5          | C4          | Si1         | 175.4(5)       |
| C7          | C6          | C5          | 121.8(5)       | C67         | C66         | C65         | 112.0(5)       |
| C7          | C6          | C11         | 119.0(5)       | C68         | C66         | C67         | 124.6(5)       |
| C5          | C6          | C11         | 119.1(5)       | C68         | C66         | C65         | 123.4(5)       |
| C56         | C57         | C58         | 121.7(5)       | C28         | C27         | C26         | 120.5(5)       |
| C57         | C58         | C53         | 118.2(5)       | C36         | C37         | C38         | 179.0(6)       |
| C57         | C58         | C59         | 122.5(5)       | C44         | C45         | Si3         | 177.6(5)       |
| C53         | C58         | C59         | 119.3(5)       | N5          | C43         | C38         | 119.2(4)       |
| C63         | C64         | C51         | 121.3(5)       | N5          | C43         | C42         | 122.0(5)       |
| C21         | C26         | C27         | 119.4(5)       | C42         | C43         | C38         | 118.8(4)       |
| C25         | C26         | C21         | 119.0(5)       | C45         | C44         | C41         | 179.0(6)       |
| C25         | C26         | C27         | 121.6(5)       | C31         | C30         | C29         | 121.6(5)       |
| C55         | C54         | C49         | 121.1(5)       | N2          | C65         | C66         | 173.7(7)       |

<sup>1</sup>/<sub>2</sub>-X,<sup>1</sup>/<sub>2</sub>-Y,<sup>1</sup>-Z

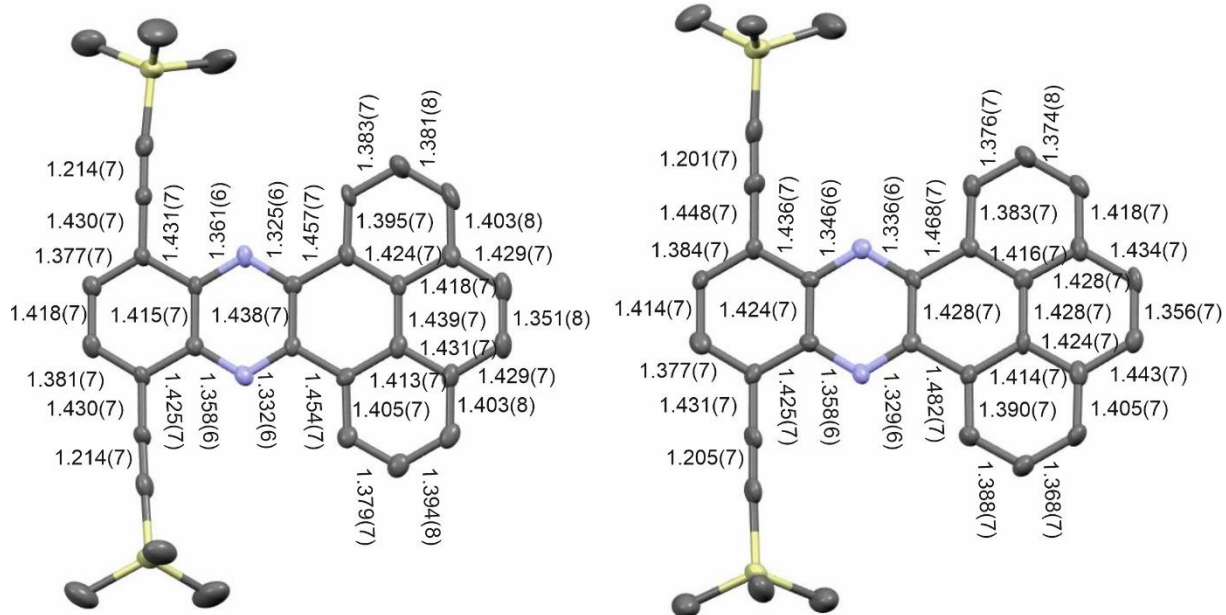

**Figure S7.** Comparison of the bond lengths for the two crystallographically independent PAA donors in  $(\text{PAA})_4^+(\text{F}_4\text{TCNQ})$ .

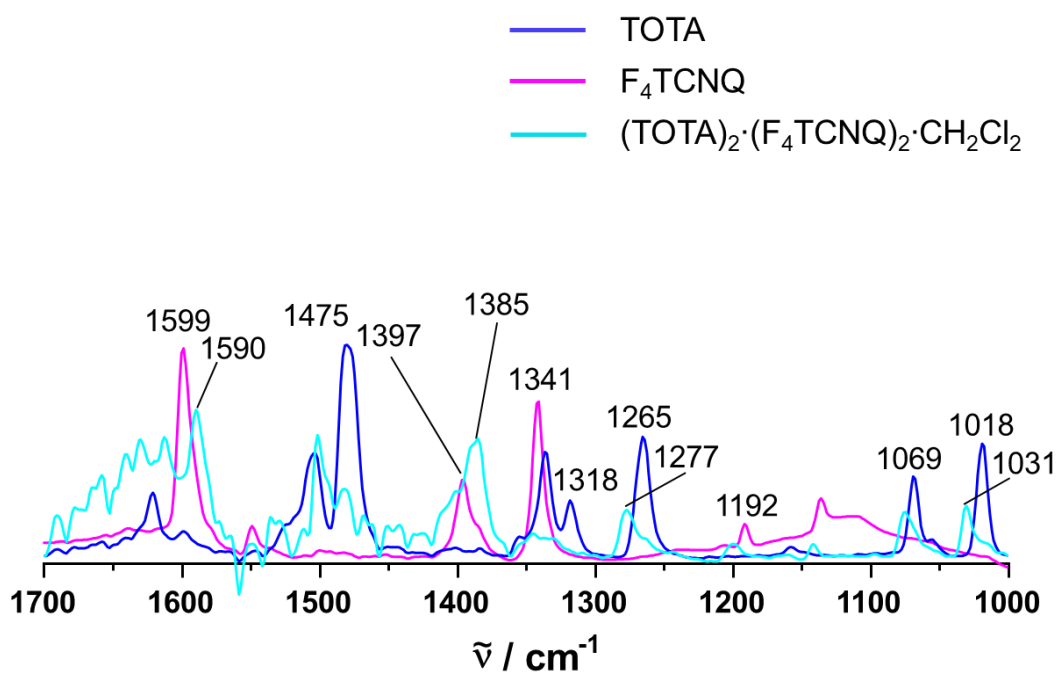

**Figure S8.** IR spectra for the arene region of the CT compound  $\text{TOTA} \cdot \text{F}_4\text{TCNQ}$  in the solid state (as KBr pellet). The blue line represents neutral TOTA, the magenta line the neutral acceptor  $\text{F}_4\text{TCNQ}$  and turquoise line the CT compound.

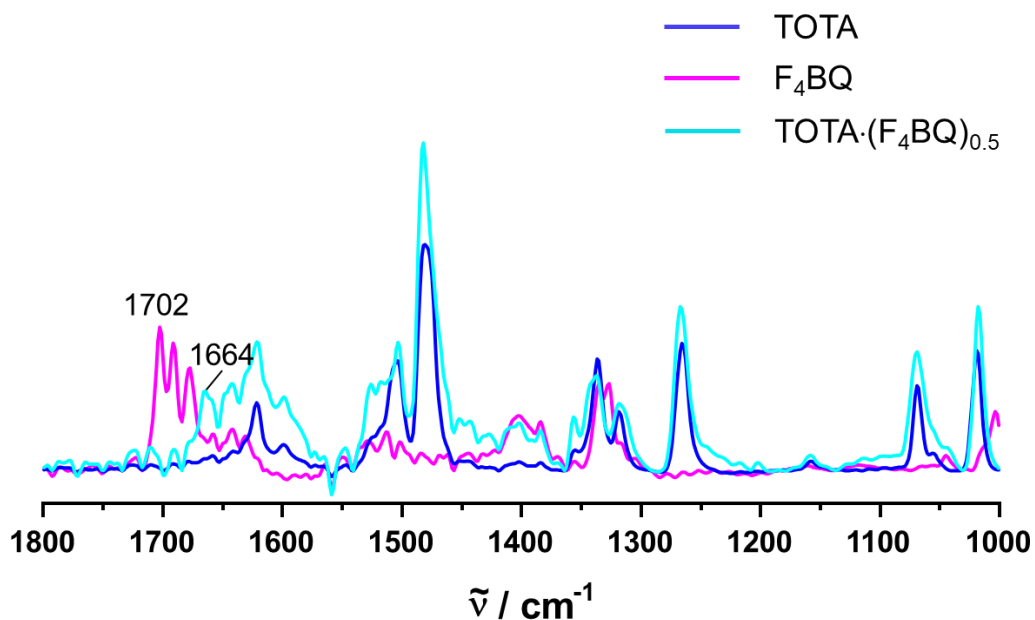

**Figure S9.** IR spectra for the carbonyl and arene regions of the CT compound  $(\text{TOTA})_2 \cdot (\text{F}_4\text{BQ})_{0.5}$  in the solid state (as KBr pellet). The blue line represents the neutral TOTA, the magenta line the neutral acceptor  $\text{F}_4\text{BQ}$  and turquoise line the CT compound.

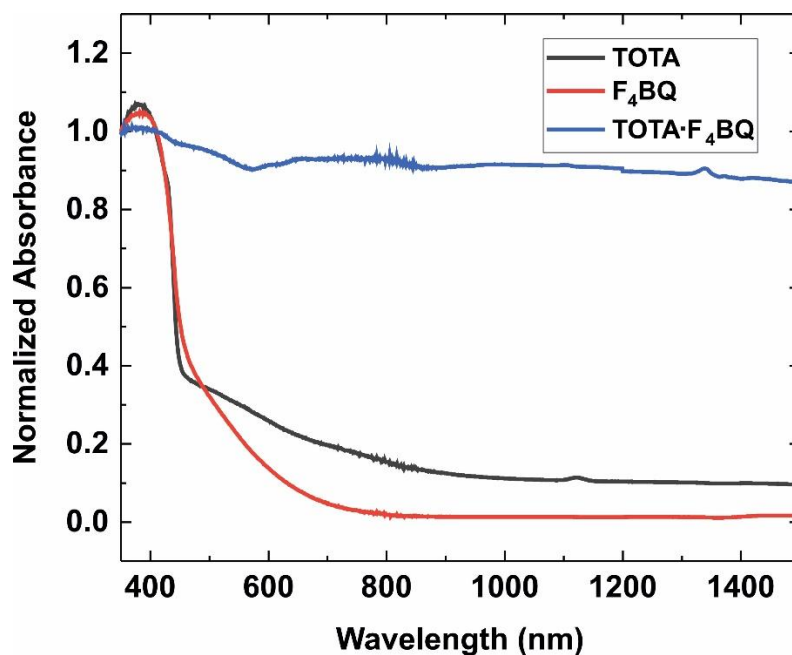

**Figure S10.** Solid state UV/vis/NIR of TOTA (blue line), F<sub>4</sub>BQ (magenta) and (TOTA)<sub>2</sub>·F<sub>4</sub>BQ (turquoise).

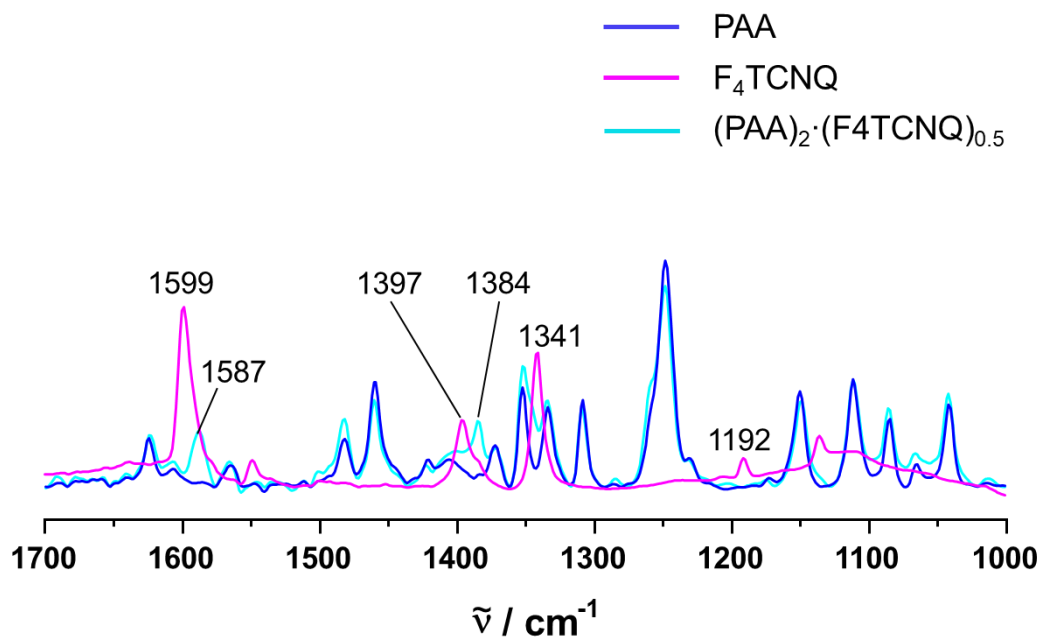

**Figure S11.** IR spectra for the arene region of the CT compound (PAA)<sub>4</sub>·(F<sub>4</sub>TCNQ) in the solid state (as KBr pellet). The blue line represents neutral PAA, the magenta line the neutral acceptor F<sub>4</sub>TCNQ and the turquoise line the CT compound.

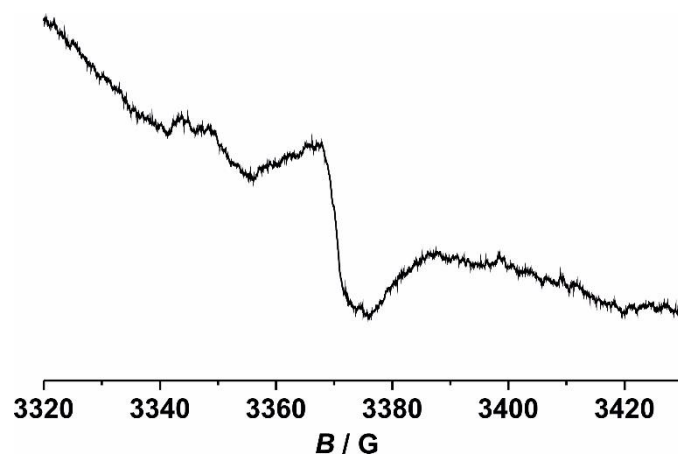

**Figure S12.** EPR spectrum of a solid sample of  $(\text{PAA})_4 \cdot (\text{F}_4\text{TCNQ})$ .

### Conductivity Studies

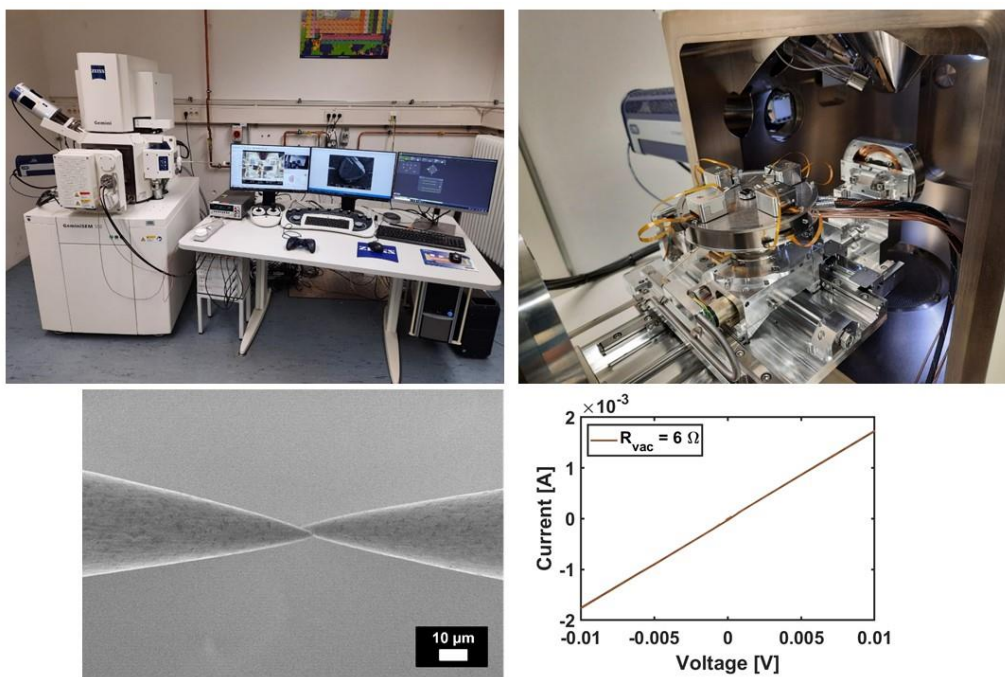

**Figure S13.** Experimental setup with nanoprobes for measuring the conductivities of solid, crystalline samples of the CT compounds of this study.

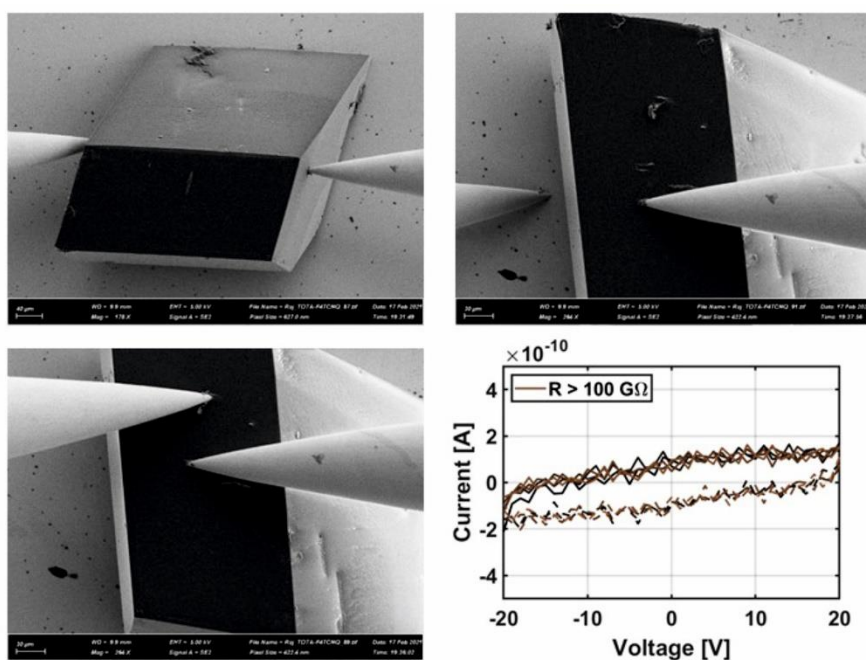

**Figure S14.** Conductivity measurement of a crystal of  $(\text{TOTA})_2 \cdot (\text{F}_4\text{TCNQ})_2 \cdot \text{CH}_2\text{Cl}_2$  with nanoprobes under a scanning electron microscope (SEM).

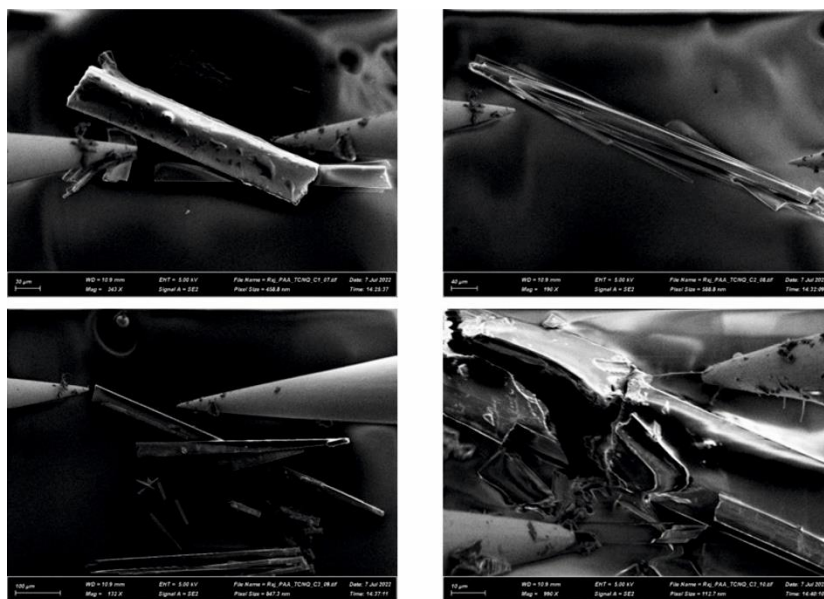

**Figure S15.** Representative conductivity measurement of a crystal of  $(\text{PAA})_4 \cdot \text{F}_4\text{TCNQ}$  with nanoprobes under a scanning electron microscope (SEM). No measurable response was recorded.



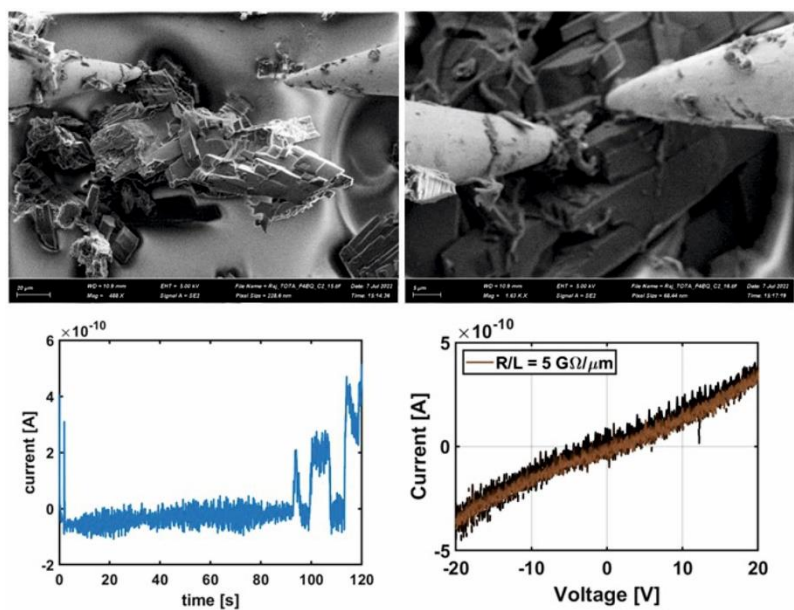

**Figure S16.** Conductivity measurement of a crystal of  $(\text{TOTA})_2 \cdot \text{F}_4\text{BQ}$  with nanoprobe under a scanning electron microscope (SEM) at a tip distance of  $13 \mu\text{m}$ .

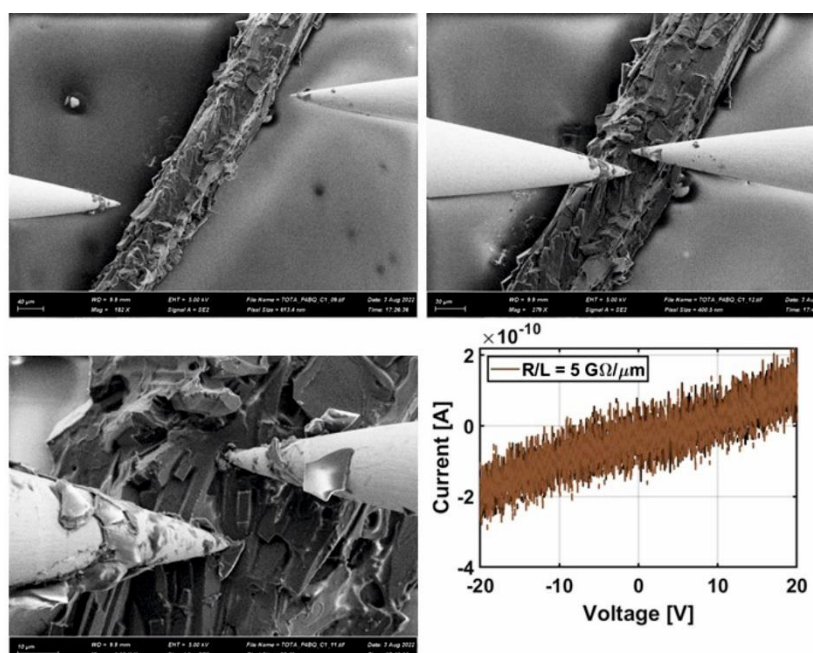

**Figure S17.** Conductivity measurement of a crystal of  $(\text{TOTA})_2 \cdot \text{F}_4\text{BQ}$  with nanoprobe under a scanning electron microscope (SEM) at a tip distance of  $21 \mu\text{m}$ .

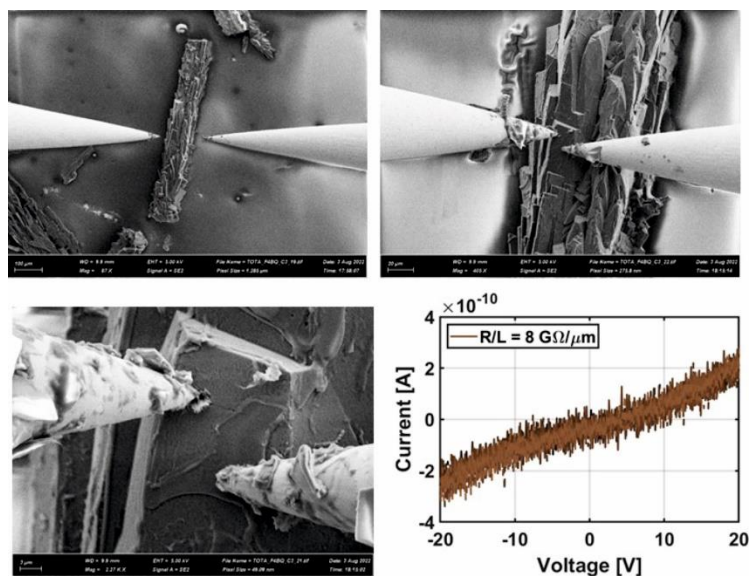

**Figure S18.** Conductivity measurement of a crystal of (TOTA)<sub>2</sub>·F<sub>4</sub>BQ with nanoprobe under a scanning electron microscope (SEM) at a tip distance of 21 μm.

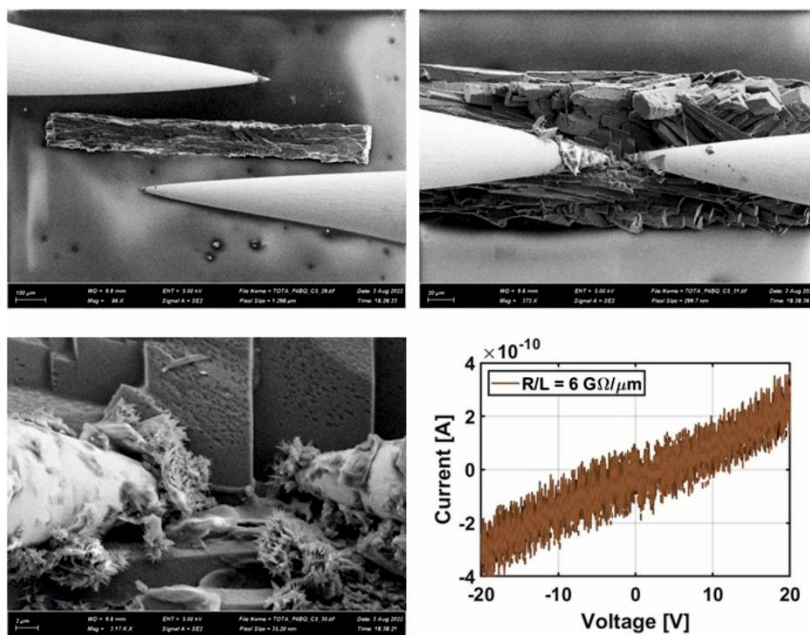

**Figure S19.** Conductivity measurement of a crystal of (TOTA)<sub>2</sub>·F<sub>4</sub>BQ with nanoprobe under a scanning electron microscope (SEM) at a tip distance of 12 μm.

## References

1. M. Kuratsu, M. Kozaki and K. Okada, *Angew. Chem. Int. Ed.*, 2005, **44**, 4056-4058.
2. R. Das, M. Linseis, S. M. Schupp, L. Schmidt-Mende and R. F. Winter, *Chem. Eur. J.*, 2022, **28**, e202104403.
3. O. V. Dolomanov, L. J. Bourhis, R. J. Gildea, J. A. K. Howard and H. Puschmann, *J. Appl. Cryst.*, 2009, **42**, 339-341.
4. G. M. Sheldrick, *Acta Cryst. C*, 2015, **71**, 3-8.
5. C. F. Macrae, I. J. Bruno, J. A. Chisholm, P. R. Edgington, P. McCabe, E. Pidcock, L. Rodriguez-Monge, R. Taylor, J. Van De Streek and P. A. Wood, *J. Appl. Cryst.*, 2008, **41**, 466-470.
